# Supplementary material for: Analysis of Cell Wall-Related Genes in Organs of Medicago sativa L. under Different Abiotic Stresses
Source: PubMed Central journal article supplement (PMC4519941; doi:10.3390/ijms160716104), 2015-07-16
Supplement: ijms-16-16104-s001.pdf [file ijms-16-16104-s001.pdf]

# Supplementary Information

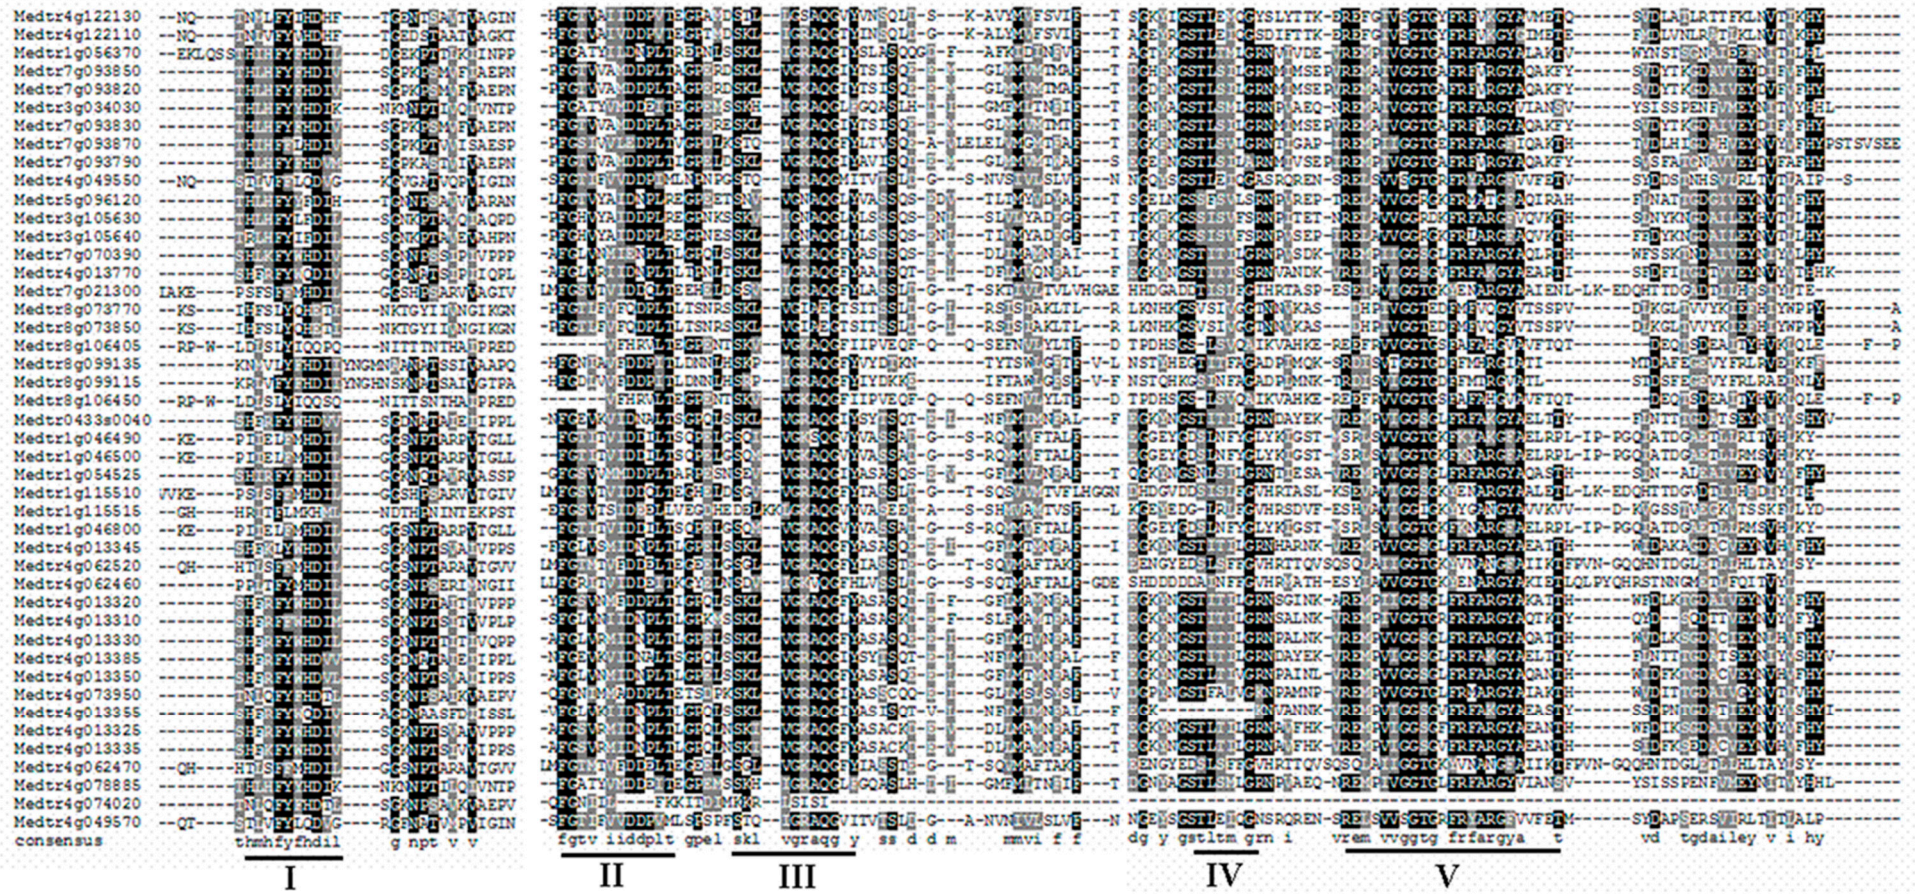

**Figure S1.** Partial alignment of *M. truncatula* dirigent and dirigent-like proteins showing the conserved five motifs (I–V) described in [29]. The alignment was performed with Kalign and the conserved residues were shaded using BoxShade (see Materials and Methods section).



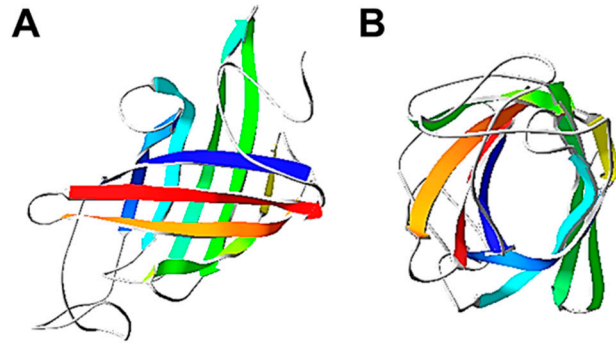

**Figure S2.** Putative 3D structure of the dirigent-like proteins Medtr1g054525.1 from *M. truncatula*. (A) lateral view showing the  $\beta$ -barrel; (B) the same structure viewed from the top to show the hydrophobic core (*i.e.*, the cavity where the substrate binds).

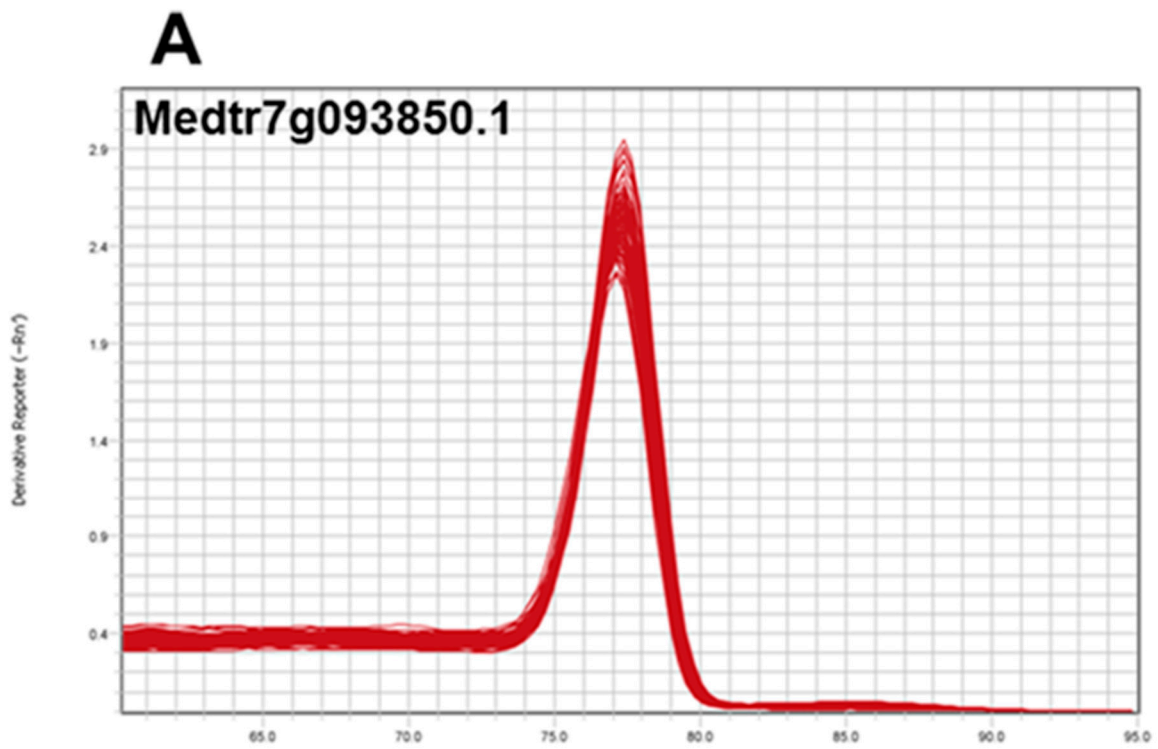

**Figure S3.** *Cont.*



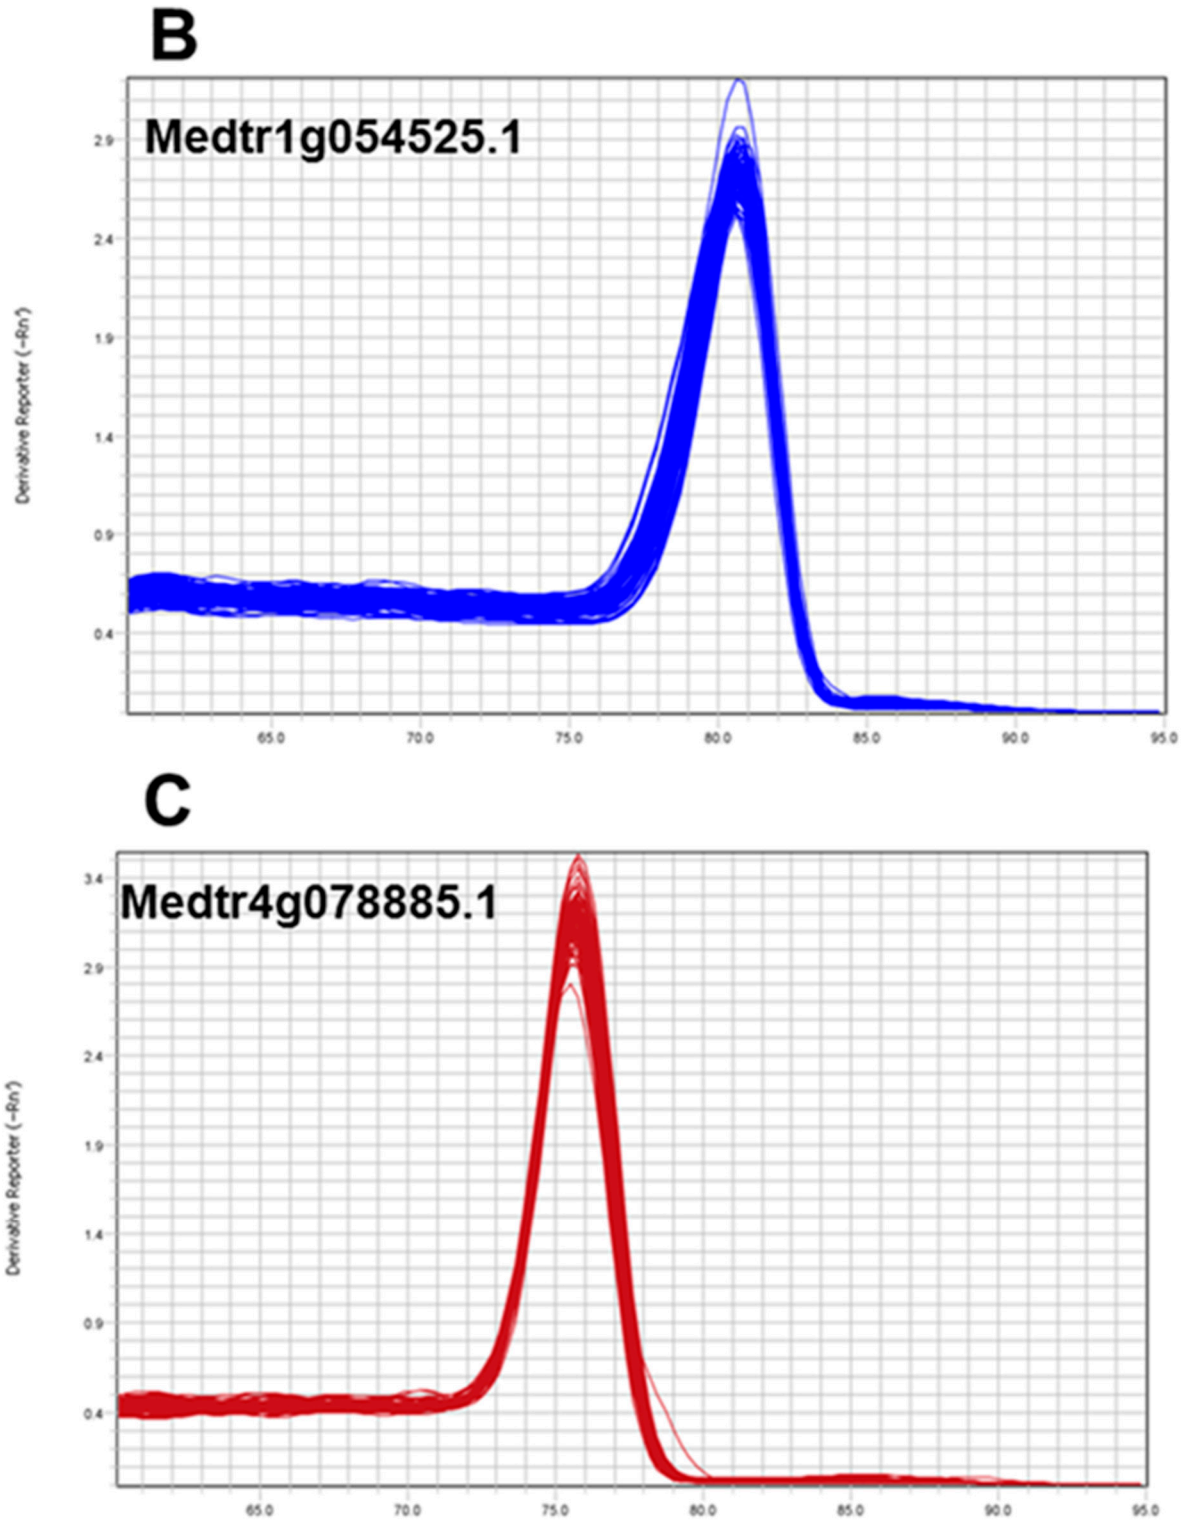

**Figure S3.** Melt curve analysis of the three genes coding for the dirigent-like proteins Medtr7g093850.1 (A), Medtr1g054525.1 (B) and Medtr4g078885.1 (C) in roots, stems and leaves of alfalfa.



MtPrx01 29 -LTPHFYDNV-CPQALPTIKSVVLHAILREKRIGASLLRLHFHDCFV-NGCDGSVLLDDT-PNF-T-GEKTALPNIN---  
 MtPrx02 25 -LTPNYDRI-CPKALPIINSIVKQAIIREPRMGASLLRLHFHDCFV-NGCDGSVLLDDT-FIF-I-GEKTAFPNIN---  
 MtPrx03 27 -LTPDFYNDV-CPQALSIINTIVROKLDKFKPRMGASLLRLHFHDCFV-NGCDGSVLLDDT-PNF-I-GEKTAKGNID---  
 MtPrx04 25 -LRKNFYKKS-CPQAEIIVKNITLOHVSSRPELEAKLIRLHFHDCFV-FGCDASVLLDST-AGN-T-AEKDAPNL----  
 MtPrx05 50 -LELGFYTKS-CPKAEQIVANFVHEHIRNAPSLAALIRMHFHDCEV-FGCDASVLLNST-N-Q-Q-AEKNAFPNL----  
 MtPrx06 27 -TRVGFYSST-CSQAESIVKSTVASHVNSDSSLAPGLLRMHFHDCEV-OGCDASVLLVAGS-G-----TEKTAFPNL----  
 MtPrx07 26 -LEVGFYTYT-CGMAEFIVKDEVRKSFNKNPGIAAGLIRMHFHDCEV-FGCDASVLLDST-LSN-I-AEKDSPANP---  
 MtPrx08 23 -LSLNYYEKS-CHDLEYIVLKTVTIATARDKIVFAALLRMHFHDCEV-FGCDASVLLNSK-GKN-K-AEKDGFPNL----  
 MtPrx09 28 -LTTDFYKSS-CPNLTKIVRKEVVKALKNEMRMGASLLRLHFHDCFV-NGCDGSILLDGG-DDF---EKSAPFNIN---  
 MtPrx10 29 -LDPSFYRDT-CPKVHSIIREVIRNVSKTDRMLASLIRLHFHDCFV-IGCDASVLLNKT-DII-V-SEQEAFPNIN---  
 MtPrx100 50 -LSFSYYRKS-CPQFESILHSHVKEWIKKDYTLAASLLRLHFHDCSV-FGCDGSILLNHE-G-----SERKSQVSK---  
 MtPrx107 25 -LAFDFYAAS-CPTAEFIRNAVSTSSSNDPSIFGKLLRMVFHDCFV-FGCDASIMLQGN-N-----TEQSDPGNR---  
 MtPrx11 29 -LDPSFYRNT-CPNVSSIIVREVIRSVSKKDRMLGSLIRLHFHDCFV-OGCDASVLLNKT-DIV-V-SEQDAFPNRN---  
 MtPrx110 25 -LSSTFYDST-CPNALSTIRTSIRTAISKERRMAASLIRLHFHDCFV-OGCDASILLDST-STI-E-SEKSARPNVN---  
 MtPrx111 24 -LSPSFYSQT-CPFLYPIVFRVIFFEASLTDRIGASLIRLHFHDCFV-OGCDGSVLLNNT-NII-V-SEQDALPNIN---  
 MtPrx114 25 -LAFDFYAAS-CPTAEFIRNAVSTSSSNDPSIFGKLLRMVFHDCFV-FGCDASIMLQGN-N-----TEQSDPGNR---  
 MtPrx116 16 -LQLGLYAFS-CQKAELIVPQVQKFRNRDKSVIAALIRMHFHDCEV-FGCDASILLDST-NNT-T-AEKDSGTNE----  
 MtPrx12 40 -LNPSFYSKT-CPNVSSIIVREVIRNVSKTDRMLASLIRLHFHDCFV-OGCDASVLLNNT-ATII-V-SEQDAFPNRN---  
 MtPrx13 26 -ELHAHYDQT-CPQLDKIITSETVLTASIHDPKVFARLIRLHFHDCFT-FGCDASVLLDST-ATN-Q-AEKDGFPNL----  
 MtPrx14 24 -LTRGFYNNV-CPNVEQLVRSAVNQKFOQTFVITAPATLRLRFHDCFV-FGCDASILLATP-----K-AEREHPDDIS---  
 MtPrx15 29 -LDNSFYRDT-CPNVHSIIVREVIRNVSKTDRMLASLIRLHFHDCFV-OGCDASILLNNT-STI-T-SEQTAFGNM---  
 MtPrx16 29 -LSPDFYAKT-CPQLQSIVFOILEKVSKTDSRMEASLIRLHFHDCFV-OGCDASVLLNKT-STI-A-SEQDAGPNIN---  
 MtPrx17 29 -LDPYFYGKT-CPKLHSIAFKVLRKVAKTDRMEASLIRLHFHDCFV-OGCDASVLLNNT-ATII-V-SEQDAFPNIN---  
 MtPrx18 41 -LSIGHYHST-CPDAEGTISQKVFAMVKKDPTLAESEIRLHFHDCIV-FGCDGSILLNHV-G-----SERTAFASK----  
 MtPrx19 38 -LNMNYLMS-CPFVEPVVKNIVNRALDNDPTLAAALIRMHFHDCEV-OGCDGSILLDST-KDN-T-AEKDSPANL----  
 MtPrx20 28 -LSPTFYSKT-CPTVSSIIVSNVLTNVSKTDQRMLASLIRLHFHDCFV-IGCDASVLLNNT-ATII-V-SEQQAFPNM---  
 MtPrx21 24 -LHVGFYSNT-CPQVESTVHDVVREAVLFDRTKAAVLLRLHFHDCFV-FGCDGSILLNNTIQN-----BEKTAFPHA----  
 MtPrx22 31 -LSKDYYSYSS-CPKLFETIVKCEVQSAISKETRMGASLLRLHFHDCFV-NGCDGSILLDDT-SSF-T-GEKTANPNKN---  
 MtPrx23 69 -LTSTFYNT-CPNVSSIIVRNVVQCALONDRMLASLIRLHFHDCFV-NGCDASILLDQG-GNITL-SERNAVPNM---  
 MtPrx24 46 -LSSTFYGTR-CPRALYIIRREIIAAVSRDRRLGASLLRLHFHDCFV-OGCDASVLLKDT-FIF-Q-GEQNAFPNAN---  
 MtPrx25 30 -LYPCFYDYS-CPQAQNVKSIILANAVAKEPRIAASLLRLHFHDCFV-FGCDASILLDMS-GSI-I-SEKGSNPNRN---  
 MtPrx26 29 -LDPSFYNST-CSIIVDSIVRGVLTNVQSQDRMLGSLIRLHFHDCFV-OGCDASILLNNT-ATII-V-SEQSAPNMM---  
 MtPrx27 29 -LTPYFYRTT-CPDVFTIVRREVLNATNEEIRMAASLLRLHFHDCFV-NGCDASILLDGD-EDI---EKTATPNIN---  
 MtPrx28 25 -LVNNFYGTT-CPSLQITIVRREMTKAINNEARIGASLIRLHFHDCFV-NGCDGSILLDDT-STF-T-GEKNAGPNKN---  
 MtPrx29 30 -LSENFYAKK-CPNVFKAVNSVHSAVAREPRMGGSLLRLHFHDCFV-NGCDGSVLLDDT-FSN-K-GEKTALPNKD---  
 MtPrx30 25 -LSPSFYSQT-CPFLYPIVFRVIYEASHTDRIGASLIRLHFHDCFV-OGCDGSVLLNNT-DII-V-SEQDAFPNRN---



MtPrx32 45 -LRPSFYLLHGCPPLAVQTI RTAITTTAVLKDPRLGASLLRLHFHDCFV-OGCDASVLLKDT-PTF-K-GEKNAAPNAN---  
 MtPrx33 24 -LSSNFYFRT-CPLVLSTIKKEVISALINERRMGASLLRLHFHDCFV-OGCDASVLLDDT-SSF-R-GEKTAGPNAN---  
 MtPrx34 26 -LSKDFYCSS-CPELLSIVNQGVINAIKKETRIGASLLRLHFHDCFV-NGCDASVLLDDT-SSF-I-GEKTAAPNAN---  
 MtPrx35 30 -LDPNFYKDT-CPNVTSIVQSI LANVSQTDPRILASFIRLHFHDCFV-OGCDASVLLNDS-DII-V-SEQALPNAN---  
 MtPrx36 20 -LSTDFYSTI-CSDVLSTIKREIDSAVGNARMGASLLRLHFHDCFV-OGCDASVLLDDT-SSF-T-GEKTAGANAN---  
 MtPrx37 26 -LCTDFYCNS-CPELLSIVNQGVNNAIKKETRIGASLLRLHFHDCFV-NGCDASVLLDDT-SSF-I-GEKTAAPNAN---  
 MtPrx38 27 -LSPNHYANI-CPNVQSI VRSVAVQKKFQOTFVTPATLRLHFHDCFV-OGCDASVIVASS-GNN-K-AEKDHPENLS---  
 MtPrx39 27 -LSENFYGKT-CPKAVRTIRKAVQDAVMNERRMGASLLRLHFHDCFV-OGCDASVLLDDT-SNF-T-GEKNAAPNAN---  
 MtPrx40 33 -LTLDFYAST-CPTVFDIVRKQMECSVLSEPRNAASVRLHFHDCFV-OGCDGSVLLDDT-YIL-K-GEKKAATNIH---  
 MtPrx41 25 -LVENFYVSS-CPNVELVVAQAVTNKFTQTITITGQATLRLHFHDCFV-EGCDASVMTASP--NG-D-AEKDAKENLS---  
 MtPrx42 27 -LSRHHYKNS-CPNVENIVREAVKKKFHQTFTVTPATLRLHFHDCFV-OGCDGSVIVSST-PHN-R-AEKDHPENLS---  
 MtPrx43 25 -LFPNFYGRY-CPSLQTI VVRREMTKAINNEARIGASLLRLHFHDCFV-NGCDGSVLLDDT-STF-T-GEKNAAPNAN---  
 MtPrx44 26 -LSPNFYAKT-CSNLQTI VVRNEMIKVIQKEARMGASLLRLHFHDCFV-NGCDASVLLDDK-GTF-V-GEKNSGPNQG---  
 MtPrx45 45 -GLSPQFYQFS-CPQANDIVMSVLEKAI AKDIRIAASLLRLHFHDCFV-OGCDASVLLDSS-ATI-V-SEKNAAPNAN---  
 MtPrx46 30 -LYPQFYDES-CPKVEEIVRSVAVAKAVTKEPRMAASLLRLHFHDCFV-EGCDASVLLDSS-GTI-I-SEKRSNPNAN---  
 MtPrx47 32 -LVMNYYKEA-CPQAEELIKQVKKLLYKRHNIAFSMLRNIFHDCFV-KSCDASVLLTST-RRS-L-SEQ-EHDRSF---  
 MtPrx48 42 -LSYGFYFAQT-CPNLENIVRKHLTKVFKSDNGQAPGLLRHFHDCFV-OGCDGSVLLDGGK-----P-GERDQPNQGG---  
 MtPrx49 27 -LTTNYYDYT-CPNALSTIKSVKAAVQRENRMGASLLRLHFHDCFV-NGCDGSVLLDST-FSM-D-SEKNAAPNAN---  
 MtPrx50 29 -LOVGFYSYS-CPSAEALVRSVAVKAVSLNPGIAGLIRMHFDCFV-EGCDASVLLAST-PGN-PIAEKDNFINNP---  
 MtPrx52 27 -LYYNFYNRT-CPNINKIVKDNILSATANLSRIAASLLRLHFHDCFV-NGCDGSVLLDDT-DIL-K-GEKNAAPNAN---  
 MtPrx53 27 -LQPGFYAKS-CPKAEQIVLKYVHDHPIPNAPSLAALIRLHFHDCFV-EGCDASVLLNST-CTN-Q-AEKDAIPNL----  
 MtPrx54 28 -LSTNFYSKT-CPKLSIVQRQVQSATSKEARIGASLLRLHFHDCFV-NGCDGSVLLDDT-SNF-T-GEKNAAPNAN---  
 MtPrx55 24 -LSVNYYEHT-CPQVESTIVAGAVHKATMNDKTPSALLRHFHDCFV-EGCDGSVLLKTK-GKN-K-AEKDGEPMI----  
 MtPrx56 27 -LQVNYYSKS-CPKAEELIKQVQVNELYNKHGNTAISWVRNLFHDCFV-KSCDASVLLLETV-HGV-V-SEQ-TAERSF---  
 MtPrx57 25 -LVNMFYGTI-CPSLQTI VVRNKMTSAIKTEPRIGASLLRLHFHDCFV-NGCDGSVLLDDT-PTF-T-GEKNAAPNAN---  
 MtPrx58 27 -LYYNFYIRT-CPNLRIVRNNILSATANLSRIAASLLRLHFHDCFV-NGCDGSVLLDDT-DIL-K-GEKNAAPNAN---  
 MtPrx60 36 -LQWHYYHNT-CDRAEVYVRHQVKIHWDDKSI IAKLLRLHFHDCFV-NGCDASVLLDEGPN-----FEKRAPQNR---  
 MtPrx61 31 -TNEMYYDNT-CPNALVAIQQAVQNAVLGARI GASLLRLHFHDCFV-OGCDGSVLLDDT-SSF-K-GEKNSIQNAN---  
 MtPrx63 25 -LIDNFYDQT-CPCLQTI VVRNTMTSAIKKEARIGASLLRLHFHDCFV-NGCDGSVLLDDT-PTF-I-GEKNAAPNAN---  
 MtPrx64 77 -LEYDFYRDS-CPHAEHIVRSTLHLLYKTNPAIVPALIRLHFHDCFV-OGCDASVLLDND-EYI-D-SEKDSPXND----  
 MtPrx65 30 -LKYGFYKTI-CSSVEAIVRRAVNKAVSLNPGIAGLIRMHFDCFV-EGCDGSVLLDSI-PGI-Q-SEKDHPPNPN---  
 MtPrx66 21 -LKTGFYSNS-CPTAESIVRSTVVSYFNKPTIAPGLLRHFHDCFV-OGCDGSVLLTAGS-S-----SEKSAIPNL----  
 MtPrx67 24 -LSSTFYDST-CPNALSTIRTVIRTA VSKERRMAASLLRLHFHDCFV-OGCDASVLLDDT-STI-E-SEKSAIPNIN---  
 MtPrx70 25 -LTPNYYDRI-CPKALPVIKSI VQALIREPRMGASLLRLHFHDCFV-NGCDGSVLLDDT-PTF-I-GEKTAGPNAN---  
 MtPrx71 29 -LDPAFYSKT-CPNLSIVREIVRNFTKIEPRMAALIRLHFHDCFV-OGCDASVLLANT-ATI-V-SEKALPNAN---  
 MtPrx74 42 -LRVDYYAKS-CPQVEQLVGSVTSQOFKQSPVSGPATLRLHFHDCFV-EGCDASVLLTASK-PGS-KELAEKDAEDNK---



```

MtPrx75 36 -LDYDFYRLS-CPRTERIVRKHLEDVFEKDSGQAPGILRLRFHDCFS-OGCDASILLNGV----D-GEDEKQHDANFA
MtPrx76 24 -LSSTFYDST-CPNALSTIRTSIRTAVSKECRMAASVIRLHFHDCFV-OGCDASILLDDT-SFI-E-SEKNALPNIN---
MtPrx78 21 -LRFGFYSEF-CPQVEEIVGEVVQSYQORDITAGALIRLHYHDCFV-NGCDASILLDSR-VNR-T-AEKDAKPNK----
MtPrx79 34 -LTLDYKQT-CPOFOQIIQOTVTSKQIQSPITAAATLRLFLHDCLENGCDASVLLSST-PFN-K-AERDNDINLS---
MtPrx81 27 -LTTNYYDYT-CPNALSTIRSVVEAAVEKENRMGGSLRLHFHDCFV-NGCDGSILLDST-PSM-D-SEKNANPNIN---
MtPrx82 60 -LRYNFYKDS-CPEAENIVRSAVTDIYSDHRDLAHSLLRLEFHDCFV-OGCDASILLE-D-RNI-S-YEKQAIIPNO----
MtPrx83 73 -LKQGFYSES-CPTAEKIVADALVEITKTNPAIANIIRLQFHDCFV-VGCDSSVLLDYT-FTG---DKVEKSSMLN-GQ
MtPrx84 28 -LSTNFYSKT-CPKLSSTIVKSTLQTAISKEARMGASILRLRFHDCFV-NGCDGSILLDIT-SSF-T-GEKNANPNRN---
MtPrx85 38 -LGTDIYQYS-CPEAEALIFSWVEQAVSSDPRMAASLLRLHFHDCFV-NGCDASVLLDIT-ENF-V-GEKTAAPNVN---
MtPrx86 25 -LSSNYYDEI-CPQALFIIKSVVKCAIIREFRMGASLLRLHFHDCFV-NGCDGSILLDIT-FTF-I-GEKTAIPNIN---
MtPrx87 30 -LKYGFYKTI-CPSAEAIIVRRAVNKAVSLNPGITAGLIRMHFHDCFV-RGCDGSVLLDSI-PGI-R-SERDHPANFP---
MtPrx88 22 -LKVGFYSSS-CPRAELIVRQVVERSFNQDRSMTAALLRMHFHDCFV-RGCDASILLDSK-KGN-E-SEKAAARANL----
MtPrx89 20 -LELGFYASS-CKAESIVKQVVQKRFNRDKSITAAALLRMHFHDCFV-RGCDASILLDSTI-KNN-I-SEKDTGAND----
MtPrx90 26 -LVHDEYYKEK-CPLAEDIVRHNVAVAVLKDPRLAASLLRLHFHDCFV-MGCDASVLLDSV-EGM-T-SEKQAGPNVN---
MtPrx91 23 -LIPNYYQKS-CPKFEDIVKQTVTDKQKTPSTAGAAIRLRFHDCMT-GGCDASVLVSSN-SFN-K-AERDADINLS---
MtPrx92 26 -LSYNYEKT-CPDVEFIVAKTVKAATASDKTVFAALLRMHFHDCFV-RGCDASVLLNSK-GSN-K-AEKDGPNA----
MtPrx93 29 -LSYNYKNS-CPNLESILVERELMSVFMTDIRAPSAELRIMFHDCQV-OGCDASILLDIT-YAT-Q-SSEIASSGNF---
MtPrx94 40 -LRPGFYSKT-CPKAETIVRDVMRKALIREPRSVASVMRLQFHDCFV-NGCDGSVLLDIT-FTM-L-GEKLALSNIN---
MtPrx95 28 -LRPGYYSKT-CPQAETIVRDVMRNALKKEPRSVASVMRFQFHDCFV-NGCDGSVLLDIT-FTM-L-GEKLALSNIN---
MtPrx97 25 -LVNMFYGRF-CPSLQTIIVREMANAIKTEARIGASILRLRFHDCFV-NGCDGSILLDIT-ATF-T-GEKNAAPNKN---
MtPrx98 28 -LSTSFYSSS-CPKLSSTVQSTVQSAISNEARMGASILRLRFHDCFV-NGCDGSILLDIT-SNF-T-GEKNANPNRN---
consensus 241 l fy t Cp l ivk v ai e rigasllrlhfhDCfv ngCdaSvllld t t gek a pn n

```

```

MtPrx01 100 -SLR--GFSVVDEIKAAVIVKV--CKGPFVVCADILATAARDSV--ATLGG--EQFFNVVLGRRDARTASKAAA--N-A-N-L
MtPrx02 96 -SLR--GFEVVDQIKEMVTKA--CKRDVVSCADILATAARDSV--ATLGG--KQYWVQVVLGRRDSREASRDAA--N-T-N-L
MtPrx03 98 -SLK--GFMVLDIIEKALDKA--CKGPFVVCADILAVIARDSV--SILGG--PSYWVQVVLGRRDARNASMKDA--E-S-Y-L
MtPrx04 95 -SLA--GFDVIDEIKAELEEK--CPG--IVSCADILTLATRDAT--K--NK--PN--WEVLTGRRDGTVSRSEALI--N---I
MtPrx05 119 -TVR--GFDIHDRIKSLVEAE--CPG--VVSCADIIALSARDSI--AATGG--PY--WQVPTGRRDGVVSNLLEANC--N---I
MtPrx06 94 -GLR--GFEVIDAKTKLEAA--CPG--VVSCADIVALAARDSV--VLSGG--LS--WQVPTGRRDGRVSOASDV--N-N--L
MtPrx07 97 -SLR--GFEVIDNAKAKLEEE--CKG--IVSCADIVAAARDSV--ELAGG--LG--YDVPAGRRDCKISLASDT--R-T-E-L
MtPrx08 93 -SLH--AFYVIDEAKKALEAK--CPG--VVSCADILALAARDAV--YLSGG--PK--WNVKGRIDGRTSKASET--R-Q---L
MtPrx09 97 -SVR--GFDVVDTIKTAVEESA--CSG--VVSCADILATAARDSV--LLSGG--PS--WSVVLGRRDGTISNGSLA--N-V-V-L
MtPrx10 100 -SLR--GLDVVNQIKTAVEKA--CPN--TVSCADILALSAQISS--ILAIQ--PN--WQVPLGRRDGLTANQSLA--N-Q-N-L
MtPrx100 117 -TLR--GYEIIDDIKAEVEKQ--CPK--TVSCADIIITASRDAT--VELGG--PY--WSVPLGRRDCKVSIKKEA--E-M---V
MtPrx107 92 -SVG--GFSVIEIAKRVLEMF--CPG--TVSCADIIIALAARDAV--ELAGG--PR--WQIPTGRRDGMVSIASNV--RPN---I
MtPrx11 100 -SLR--GLDVVNQIKTAVEKA--CPN--TVSCADILALSAELSS--TLAIQ--PD--WQVPLGRRDGLTANQLLA--N-K-N-L
MtPrx110 96 -SVR--GFEIIDKAKSEVEKV--CPG--VVSCADILAVAARDAS--FAVGG--PS--WTVPLGRRDSTTASKSLA--N-T-D-L
MtPrx111 95 -SLR--GLDVVNQIKTAVENE--CPA--TVSCADILITIAAQVAS--VLGGG--PS--WQIPLGRRDSLTAHQALA--N-Q-N-L
MtPrx114 92 -SVG--GFSVIEIAKRVLEMF--CPG--TVSCADIIIALAARDAV--ELAGG--PR--WQIPTGRRDGMVSIASNV--RPN---I
MtPrx116 86 -CVR--GYDIDNVKEATKVV--CPL--TVSCADIVALATRDVV--PLSGG--PT--WQVPTGRRDGLVSN--NEV---N---I
MtPrx12 111 -SLR--GLDVVNQIKTAVEKA--CPN--TVSCADILALAAELSS--TLSQG--PD--WQVPLGRRDGLTANQSLA--N-Q-N-L
MtPrx13 97 -SVR--SFYVIDEAKAKLELA--CPG--VVSCADILALLARDVV--AMSGG--PY--WQVPLGRRDGRVSKASDT--A-N---L
MtPrx14 92 -LAG--GFDITVVKKAAVIRDPK--CRN--KVSCADILALATRDVV--NLGGG--PF--WVVELGRRDGRVSTIASV--C-R-S-L
MtPrx15 100 -SLR--GLDVVNQIKTAVENA--CPN--TVSCADILALAAEISS--VLANG--PD--WQVPLGRRDSLTAHQTLA--N-I-N-L
MtPrx16 100 -SLR--RLDVINQIKTEVEKV--CPN--KVSCADILTLAAGVSS--VLSGG--PG--WTVPLGRRDSLTAHQSLA--N-R-N-L
MtPrx17 100 -SLR--GLDVINQIKTKVEKA--CPN--RVSCADILTLASGISS--VLGGG--PG--WEVPLGRRDSLTAHQSLA--N-Q-N-L
MtPrx18 108 -TLR--GFQLIDEIKAELEER--CPR--TVSCADILTLAATRDAT--ILAGG--PF--WEVPLGRRDCKISIAKEA--N-L---V
MtPrx19 108 -SLR--GYEVIDDIKDELENR--CPG--VVSCADILAMAATEAV--FYAGG--PV--WNVKGRIDGRRSKIEDT--R-N---L
MtPrx20 99 -SLR--GLDVVNQIKTAVEESA--CPN--TVSCADILALAAQASS--VLAGG--PS--WTVPLGRRDGLTANRTLA--N-Q-N-L
MtPrx21 92 -GVK--GFEVIERAKAQLLEAS--CPG--VVSCADIVALAARDAT--VMANG--PA--WQVPTGRRDGFVSDKSLA--G-N---M
MtPrx22 102 -SPR--GFEVIDKIKSAVEKV--CPG--AVSCADIIITARDSV--EHLGG--PT--WQVPLGRRDARTASKSAA--N-N-D-I
MtPrx23 141 -SPR--GFDVVDKIKTSVENS--CPS--VVSCADILALAAEASV--SLSGG--PS--WVVLGRRDGLIANQSGA--N-T-S-I
MtPrx24 117 -SLR--GFEIIDSIAKALEAV--CPN--VVSCADILAVAARDASV--ATLGG--PI--WQVPLGRRDSTTANFNAA--N-S-D-L
MtPrx25 101 -SPR--GFEVIDEIKYALEKE--CPH--TVSCADILALAAARDSI--VLGGG--PN--WEVPLGRRDSLGAISLGS--N-N-N-I
MtPrx26 100 -SLR--GLDVINQIKTAVENA--CPN--TVSCADILALSAEISS--DLANG--PT--WQVPLGRRDSLTAHQNSLA--A-Q-N-L
MtPrx27 98 -SPR--GFEVIDRIKSSVESS--CSG--VVSCADILAVARDSV--HLSGG--PF--WVVLGRRDGLVSNKTLA--N-N-A-I
MtPrx28 96 -SPR--GFEVIDAIKTSVEAA--CSA--VVSCADILALATRDGI--ALLGG--PS--WVPLGRRDARTASQSA--N-S-Q-I
MtPrx29 101 -SLR--GFEVIDAIKSKVESV--CPG--VVSCADIVAAARDSV--VNLGG--PF--WQVPLGRRDCKTASLND--N-S-GVI
MtPrx30 96 -SLK--RLDVVNQIKTAVEEE--CPN--TVSCADIIITIAAEVSS--ILGGG--PS--WQIPLGRRDSLTAHQTLA--N-Q-N-L

```



MtPrx32 117 -SIR--GYEIIIESVKAQIEELL--CPN--VVSCADILALAARDV--VALGG--FN--WLVRLGRRDSTTADFNA--N-S-D-L  
 MtPrx33 95 -SIR--GFDVIDKIKSEVEKL--CPN--VVSCADILAVAARDV--VALGG--LS--WTVQLGRRDSTTASFGLA--N-S-D-L  
 MtPrx34 97 -SIR--GFNVDDIKANVEKA--CPG--VVSCADILTLAARDV--VHLGG--FS--WNVVLGRRDSITASRSDA--N-N-S-I  
 MtPrx35 101 -SIR--GLDIVNCIKAATIELA--CPS--VVSCADILALGANVSS--VLALG--FD--WEVPLGRRDSFNANQSLA--N-S-S-L  
 MtPrx36 91 -SIR--GFDVIDTIKTELESL--CPN--TVSCADILSVAARDV--VALGG--FS--WTVQLGRRDSITASLSLA--N-S-D-L  
 MtPrx37 97 -SIR--GFNVDDIKASVEKA--CPK--VVSCADILALAARDV--VHLGG--FS--WIVVLGRRDSITASRSDA--N-N-S-I  
 MtPrx38 98 -LAG-I-GFDITVIKAKAALIAVPC--CPN--KVSCADILALATRDVI--NLGG--FS--YTVELGREDGLVSRSSDV--N-G-R-L  
 MtPrx39 98 -SIR--GFELIDDIKSQLEDM--CPN--TVSCADILALAARDGV--AELGG--QR--WNVLLGRRDSTTANLSEA--N-T--L  
 MtPrx40 104 -SLK--GFELIDDIKSNFVESE--CPG--VVSCADILTLAARDV--ILVGG--PY--WIVPVGRKDSVTASFELA--N-T-N-L  
 MtPrx41 95 -LPG-I-GFDITVIKAKQAVESV--CPG--VVSCADILALATRDVI--ALLGG--FS--FSVELGRRDGLNSKASNV--E-A-N-L  
 MtPrx42 98 -LAG-I-GFDITVIQAKAAVIAVPL--CPN--KVSCADILAMATRDVI--ALGG--PY--YEVELGREDGLRSKSDV--N-G-K-L  
 MtPrx43 96 -SIR--GFEVIDAIKTSVEAA--CSA--TVSCADILALATRDGI--ALLGG--FS--WIVPLGRRDARTASQSAA--N-T-Q-I  
 MtPrx44 97 -SIR--GFEVIDTIKTSVETA--CKA--TVSCADILALATRDGI--ALLGG--FS--WAVPLGRRDARTASQSAA--N-S-Q-I  
 MtPrx45 117 -SVR--GFEVIDEIKSKLEQA--CPR--TVSCADIVALAARGST--VLSGG--FN--WEIPLGRRDSKTASLRGS--N-K-N-I  
 MtPrx46 101 -SIR--GFEVIDEIKSAVEKE--CPQ--TVSCADILTLAARDST--VLTGG--FS--WIVPLGRRDSLGAISIGS--N-N-N-I  
 MtPrx47 102 -GLR--NFRYIDTIKEAVERE--CPG--VVSCADILVLSAREGI--VSLGG--PY--IPLKTGRRDGRKSRVDLL--E-A-Y-L  
 MtPrx48 110 MRTE--MLKTIIDIRALVHKE--CGR--IVSCADITVLAGREAV--FLSGG--FN--FEVPLGRKDGTSTFSIKGT--S-N--L  
 MtPrx49 98 -SIR--GFEVVIDEIKDAVKA--CGKPVVSCADILALTAARDV--VALGG--FS--WVVKLGRRDSKTASRADA--D-SGN-I  
 MtPrx50 101 -SIH--GFEVIDEAKAQLEVV--CPQ--TVSCADILTEATRDS--ILKLSGGTIN--YIVPSGRRDGRVSI SDEV--P-K-N-I  
 MtPrx52 98 -SIR--GFDVIDKIKSDLENA--CPS--TVSCADILTLAARDV--YQSKG--FF--WAVPLGRRDGTASESEA--N--N-L  
 MtPrx53 97 -ILR--GYEFIDTIKSLVEKE--CPG--VVSCADILTLTARDSI--HAIGG--PY--WVVPITGRRDGIISKAADTFT--S--L  
 MtPrx54 99 -SVR--GFDVIDNIKTAVENV--CPG--VVSCADILALTAARDV--ALLGG--PT--WNVVLGRRDATTASQSAA--N-T-A-I  
 MtPrx55 94 -SIH--AFYVIDNAKKALEAV--CPG--VVSCADILALAARDV--TILSGG--FN--WEVEKGRKDGIIISKA TET--R-Q--L  
 MtPrx56 97 -GMR--NPKYVSTIKAALBEKE--CEL--TVSCADIVALSARDGI--ARLGG--FN--FEMKSGRKDSKESYVKVV--E-Q-F-I  
 MtPrx57 96 -SIR--GFEVIDTIKTSVEAS--CNA--TVSCADILALAARDGV--FLVGG--PT--WVPLGRRDARTASQSAA--N-S-Q-I  
 MtPrx58 98 -SIR--GFDIIDKIKSDLEYA--CPN--VVSCADILTLAARDV--YQSRG--FF--WAVPLGRRDGTASESEA--N--N-L  
 MtPrx60 104 -GLG--GFVLIDRIKIVLESR--CPG--IVSCADILHLAARDA--KMAGA--FG--YEIFETGRKDG MKSDAASV--D--L  
 MtPrx61 102 -SIR--GFELIDDIKSTLETM--CPN--VVSCADILTLAARDV--VLLGG--QS--WNVPLGRRDSTTASLDAS--N-S-D-I  
 MtPrx63 96 -SVR--GFEVIDNIKSNVEAS--CNA--TVSCADILALAARDGV--VLLGG--FS--WTVPLGRRDARTANQSAA--N-S-Q-I  
 MtPrx64 147 -SLK--GFDVIEETIKAKLEEA--CPG--VVSCADILVLAARDV--VLGG--FF--YELNFGRRDGSNSFADIATD--E--L  
 MtPrx65 101 -SIR--GFEVINEAKAQIEAA--CPK--TVSCADILALFAARDSARKVSGGRID--YSVPSGRRDGRVSI FDEV--T-Q-N-L  
 MtPrx66 88 -GLR--GFEVIDNAKSQIEAI--CPG--VVSCADILALAARDV--ILSIG--FS--WEVPTGRKDGRI SLSSQA--S-N--L  
 MtPrx67 95 -SVR--GFEVIDKAKANVEKV--CPG--VVSCADIVAVAARDAS--FAVGG--FS--WTVKLGRRDSTVASKSQA--N-S-D-L  
 MtPrx70 96 -SIR--GFEVVDQIKAAVTKA--CKRDVVSCADILALTAARDV--ALLGG--KQYW--YQVLLGRRDSRFASRDAA--N-T-N-L  
 MtPrx71 100 -SIR--GLQVNRRIKTIIVEKA--CPN--TVSCADILALARTISS--VLSKG--FG--WIVPLGRRDSL TANRTLA--N-Q-N-L  
 MtPrx74 114 -DLRMEGFETIRKAKEVVEKK--CPT--VVSCADILALTAARDV--HLGG--PY--YQVKKGRMDGKISMASRV--G-S-N-I

```

MtPrx75 107 LREE--ALQTIENIRAIVRKQ--CFR--VVSCADILVLAARDAV--RQFGG--PD--IDVPLGRKDSLNFVSNSP-D-N--L
MtPrx76 95 -SVR--GFEIIDKAKSEVEKI--CPG--VVSCADILAVAARDAS--FAVGG--PS--WIVKLGRRDSTTASKSLA-N-T-D-L
MtPrx78 91 -TLR--GFNLIIDIKSNLEQQ--CPQ--TVSCADILTIATRDAI--ALSNG--PT--YNVLTGRRDGLVSNQFNV---T--I
MtPrx79 106 -LPG--DSFDLIVRIKTALELS--CFN--TVSCADILATAARDL--IMLGG--PH--YNVYLGRRDGRASVSSFV-D-G-F-L
MtPrx81 98 -SFR--GFEVVEIKDAVEKA--CGKF--VVSCADILAVAARDSV--VALGG--PS--WVVKLGRRDSTASRADA-D-SGN-I
MtPrx82 129 -TLK--GFEKVDLKEEVEQA--CPG--VVSCADILALAARDSV--FLGGG--PF--YFVLTGRRDSLQSFQEAAD-Q--I
MtPrx83 145 -LLK--GTEIIDDIKAKLPEQ--CPG--IVSCDTIAFSVNEGM--FLSGL--FR--TAPLGRRDALYSLASIAED-D-N-L
MtPrx84 99 -SFR--GFDVIDNIKTAVENV--CPG--VVSCADILATAARDSV--AILGG--ET--WNVKLGRRDAKTASQSAA-N-T-A-I
MtPrx85 109 -SLR--GFDVINEIKSELEVV--CPQ--TVSCADILATAARDSV--ILSGG--ET--WEVQMGRKDSITASKAGA-N-N-N-I
MtPrx86 96 -SLR--GFEVVDQIKAAVEKA--CKRF--IVSCADILATAARDSV--AILGG--HKYWYQVLLGRRDSRFASRDAA-N-I-N-L
MtPrx87 101 -SLR--GFEVINEAKAQIDAA--CPK--TVSCADILATAARDASARKVSGGRID--YSVPSGRRDGRVSIFDEV-T-Q-N-L
MtPrx88 92 -TVR--GYNLIDEIKRILENA--CPS--TVSCADIIISLATRDSV--VLAGG--PS--YNVPTGRRDGLVSTVNDV---H--L
MtPrx89 90 -SVR--GYDLIDDVKEAEBA--CPS--TVSCADIVALATRDAV--ALSGG--PK--YNIPTGRRDGLIANRDDV---D--L
MtPrx90 97 -SLR--GFEVIDKIKYLLBKE--CPL--TVSCADILAMVARDAV--ELRGG--FR--WEVWLGRKDSLESSFSGA-N-L-F-I
MtPrx91 94 -LSG--IGFEVTRAKNMLE--CPG--VVSCADILAAARDIV--VSVGG--PF--YETLLGRRDSLESKSIDA-E-N-K-Y
MtPrx92 96 -SH--AFETIDNAKKALEBA--CPG--VVSCADILAAARDAV--FLSGG--PS--WDIPKGRKDGRIKASET-I-Q--L
MtPrx93 100 -AIR--NRETIINDIKSVLEEE--CPG--QVSCADIVLAARKVSV--SLSGG--PS--IQVPEGRKDSRTSSSKEA-D-A-K-L
MtPrx94 111 -SLR--SFEVVEVKEALEKA--CPG--VVSCADIIIMASRDV--ALTGG--ED--WEVRLGRDLSLTASQEDS-D-N-I-M
MtPrx95 99 -SLR--SFEVVEVKEALEKA--CPG--VVSCADIIIMASRDV--ALTGG--ED--WEVRLGRDLSLTASQDNS-S-N-I-M
MtPrx97 96 -SFR--GFEVIDIKTSVEAS--CNA--TVSCADILALAARDGV--FLGG--PT--WVPLGRRDARTASQSAA-N-S-Q-I
MtPrx98 99 -SFR--GFDVIDNIKTAVENV--CPG--VVSCADILATAARDSV--AILGG--ET--WNVKLGRRDAKTASQSAA-N-T-A-I
consensus 321 sir gfevid ik ve Cp vvSCaDilalaardsv l gg p w vplGRrDa a s a n l

```



MtPrx01 169 PSETFNFSQLISNFKSQGLNVKDLVALSGGHTIGFARCTTFERNRIY---N-----E-TNIDPIFAASLRK--TC  
 MtPrx02 165 PPEFFNFSQLITNFKSHGINLKDVLVLSGGHTIGFSKCTNFRDRIF---N-----D-TNIDTNFAANLQK--TC  
 MtPrx03 167 PSQLFNLSQLVSNFESQGLNLKDLVALSGAHTIGMAKCTSTERERIY---N-----D-TNIDPDFATCLOD--NC  
 MtPrx04 159 PAEFHNTQLRQIEANKKLLHLHDLVLSGAHTIGVGHGCHLFSNRLE---NFTGKGD---QD-PSLNPTYANFLKT--KC  
 MtPrx05 185 PAEFSNETTLQTLFANQGLDMKDLVLSGAHTIGISLCTSFNSRNL---NFTGKGD---QD-PSLDSEYAKNLKTF--KC  
 MtPrx06 159 PAEGDSVDEQKQKFAKGLNTQDLVILVGGHTIGTTACQFFSNRLR---NFTTNGA---AD-PSIDPSFLSQLQT--LC  
 MtPrx07 163 PPETFNVNCLTQLFAKGLTQDEMVLVLSGAHTIGRSHCSAFSKRLY---NFSSTSI---QD-PSLDPSYAALLKR--CC  
 MtPrx08 158 PAETFNLSQLQQSFSQRALSVEDLVALSGGHTLGFSSHCSFQNRILQ---NFNATHD---VD-PSLHQSFAAKLKS--IC  
 MtPrx09 163 PSEFDFLDITVSKFTNVGLNLTQVLSLGAHTIGRARCALFSNRLE---NFSGTGS---PD-STLETGMLTDLQN--LC  
 MtPrx10 166 PAEFNSLDQLKSAFAAAGLSTDLVALSGAHTIGRARCFTFITDRLY---NFSSTGK---PD-PTLNTTYLQELRK--IC  
 MtPrx100 182 PMGHENITSLIEYFQSKGLNVLDLVLVLSGAHTIGRTSCGSIQYRLY---NYKGTGK---PD-PSLDTKYLNFLQR--KC  
 MtPrx107 158 VDTSFMDKEMKLFSSKGLSLLDLVLVLSGAHTIGTAHCNTERGRFQ---Q-DRNGSLRLID-QTIDTNYADQLIK--CC  
 MtPrx11 166 PAEFNTTDQLKAFAAAGLDTTDLVALSGAHTIGRAHCSLFFVSRLY---NFNGTGS---PD-PTINTTYLQQLRT--IC  
 MtPrx110 162 PLFTDITTLISHEFSKKNLSPKEMVTLVLSGAHTIGCAQCFTFRGRIY---N-----NASDIDAGFASTRQR--GC  
 MtPrx111 161 PAEFFTLDQLKAFELVQGLNNTDLVLSGAHTIGRAKCTEINRLY---NFNSTGN---PD-QTINTTYLQTLRE--IC  
 MtPrx114 158 VDTSFMDKEMKLFSSKGLSLLDLVLVLSGAHTIGTAHCNTERGRFQ---Q-DRNGSLRLID-QTIDTNYADQLIK--CC  
 MtPrx116 149 PPETFVVKVLSQFFMTKGIITEEMVALGAXTIGVAHCGFFSNRLS---SSGK-----PD-PTMDPTLDAKLVK--LC  
 MtPrx12 177 PAEFNSLDQLKAFASQGLSTDLVALSGAHTIGRAHCSLFFVSRLY---NFSNTGS---PD-PTLNATYLOQLRN--IC  
 MtPrx13 162 PAFTLVGQLIQSFAKGLGVKDMVLSGGHTLGFSSHCSFEARLH---NFSSVHD---TD-PRLNTEFALDLKN--KC  
 MtPrx14 161 PGPHFNINQLNMFNLHGLSQTDMVALSGAHTIGFSHCNRFNSRRIY---GFSRPSR---ID-PSLNLOYAFQLRQ--MC  
 MtPrx15 166 PSEAFNLTQLKSNFDNQGLDATDLVALSGAHTIGRGCCRFFVDRLY---NFSNTGN---PD-PTLNTTYLQTLRT--IC  
 MtPrx16 166 PGFSSLDQLKSSFAAAGLNTVDLVALSGAHTIGRARCFLFILDRLY---DFDNTGK---PD-PTLDPTYLKLQK--CC  
 MtPrx17 166 PGENFSLDRLKSAFAAAGLNTVDLVALSGAHTIGRARCFLFILDRLY---NFNNTGK---PD-PTLDTTYLQQLRN--CC  
 MtPrx18 173 PQGHENITGLIGFQERGLDMLDLVLSGSHHTIGRSTCYVMNRIY---NFNGTGM---PD-PSINIYYLKMIRK--FC  
 MtPrx19 173 PSESFNASELITQEGQHGEAQMVALSGAHTLGVARCSSEKNRIS---Q-----VD-PALDTEFARTLSR--TC  
 MtPrx20 165 PAEFNTLVQLKAFETAAGLNTTDLVALSGAHTIGRAHCAQFVGRLY---NFSSTGS---PD-PTINTTYLQQLRT--IC  
 MtPrx21 157 PDVNDSTIQQLKTKFELNKGLEKDLVLSAHTIGTTACFFMRKRLY---EFFPFG---SD-PTINLNFPELKA--RC  
 MtPrx22 168 PAETSSLNCLISRFNALGLSTKDLVALSGGHTIGCARCTTFRAHIY---N-----D-SNIDTSFARTRQS--GC  
 MtPrx23 207 PNFETSLANVTAKFAAVGLNTSDLVALSGAHTIGRGCCRFFNQRLY---NFSGTGK---PD-PTLNSTYLATLQ--NC  
 MtPrx24 183 PSEFLNLSGLIAAFKKGESADEMVALSGAHTIGKAKCAVFKNRRIY---N-----E-SNINPYRSLQN--TC  
 MtPrx25 167 PAFNNTFQTLITKFKLQGLDIVDLVALSGSHTIGKSRCTSFQRRLY---NOTGNGK---QD-FTLDQYYAAELRT--CC  
 MtPrx26 166 PAETFNLTQLKSSFDNQNLTTDLVALSGGHTIGRGCCRFFVDRLY---NFSNTGN---PD-STLNTTYLQTLQA--IC  
 MtPrx27 164 PSEFDSLDTLISKFDNVGLSVKDVVTLVLSGAHTIGRARCFFSNRLE---NFSGTQE---PD-NSLEYEMLTELQN--LC  
 MtPrx28 162 PGESSILSTLITMERNKGLILNDITVLVLSGAHTIGCAEQCFERTRIY---N-----E-TNIDTNFATLRKS--NC  
 MtPrx29 168 PPEFSTLNNLINREKAQGLSTKDMVALSGAHTIGRARCFTVYRRIY---N-----D-TNIDSLFAKSRQR--NC  
 MtPrx30 162 PGFSTLDQLKASELVQGLNNTDLVLSGAHTIGRARCFAFINRLY---NFSGTGN---PD-PTINTTYLQTLRL--IC

MtPrx32 183 PSFFLLDGLTAAPFKKGGTAEMVALSGAHTIGKAKGLIRNRIY---N-----E-SMIDPNVAKSLQAFLEC  
 MtPrx33 161 PGGSDLSGLINAFNNKGGTPKEMVALSGSHTIGEASCRFFRTRIY---N-----E-NNIDSSFANSLQS--SC  
 MtPrx34 163 PAFFLNLSALKTNFANQGLSAKDLVALSGAHTIGLARCVCQFRAHIY---N-----D-SIVDSLFRKSLQN--KC  
 MtPrx35 167 PGERFILDDELKTSFLNQGLDITDLVALSGAHTIGRGVCLLFNDRMY---NFNNTGV---PD-PTINTTLLQSLQA--IC  
 MtPrx36 157 PGGSDLSGLITSEFNKGGTPKEMVALSGSHTIGCASCRFFRTRIY---N-----D-DNIDSSFATSLQA--NC  
 MtPrx37 163 PAFFFLNLSLTKTNFANQGLSVDLVALSGAHTIGLARCVCQFRAHIY---N-----D-SIVDPLFRKSLQN--KC  
 MtPrx38 167 PQESFNLNQLNTLFFANGLTQTDMIALSGAHTLGFSHCDRFSNRI-----QTP---VD-PTLNKQYAAQLQQ--MC  
 MtPrx39 163 PAFFFLNDGLITAFKAKGGTAEMVTLSGAHTIGLVRCRFRFRARIY---N-----E-TNIDPAFAAKMQA--EC  
 MtPrx40 170 PTFDESLSVLIIPKFQGLSVTDMVSLVGSHTIGMARCONFRSRIY---DYESTSV---K-NPISDNQFNMLKS--IC  
 MtPrx41 162 PKFTFNLNQLNTIFSKHGLSEKDMIALSGAHTVGFSHCDQFTNRLY-----SSQ---VD-PTIDPTVAQQLMS--GC  
 MtPrx42 167 PEGFNLNQLNTLFFKHGGLTQTEMIALSGAHTVGFSHCNKFTNRVY---NFKTTSR---VD-PTLDLKYAAQLKS--MC  
 MtPrx43 162 PSPASDLSLTKMFKQKGLTLRDLTVLVALSGAHTIGCAEQCFRNRRIY---N-----E-TNIDTNFATLRKA--NC  
 MtPrx44 163 PGGSSDLSLTKRMFKQKSLTLNDLTVLVALSGAHTIGQTECQFRNRRIH---N-----E-ANIDRNLATLRKR--NC  
 MtPrx45 183 PBNATIEGLITFEKQGLDEVDLVALSGAHTIGVAKCATFKQRLY---NQNGNNQ---PD-SNLEKTFYFGLKS--MC  
 MtPrx46 167 PBNNTFQTLITKEKLGKLNIVDLVALSGSHTIGDSRCTSFRORLY---NQTGNK---SD-FTLDQNYAAQLRT--FC  
 MtPrx47 168 PDHNEISAVLDKFGAMGIDTPGVVALLGAHSVGRTHCTKLVHRLY-----PEV-----D-PANPEHIPHMLK--KC  
 MtPrx48 176 PQEFNKTDVTLKVEAAQNFVDVVALSGAHTIGRAHCGTFFNRLS---P-----AD-PTLDKTLAQNLEKN--TC  
 MtPrx49 166 PGPAFSLSQLIKNFQDQGLNEKDLVALSGAHTIGFSRCFLFRDRIY---K-----D-NNINAYFAKQLQN--VC  
 MtPrx50 169 PSFFLNADQLIANFAQKGLSIDEMVTLSGAHSIGVSHCSSFSNRLY---SFDTIS---QD-PSMDPSFAESLKT--KC  
 MtPrx52 163 PSFFFELENITAKFISKGLEKKDVAVLVALSGAHTIGFAQCFTFKPRLF---DFGGSGK---SD-PSLDSLLQNLQK--VC  
 MtPrx53 163 PAFFHNLTVLITLFGNVGLDANDLVLLSGAHTIGVSHCSTISTRLY---NFTGKGD---QD-PDLIDNEYAKNLTFT--KC  
 MtPrx54 165 PRPTSNINILTSMPKKNVGLSTKDLVALSGAHTIGCARCTTFRVRRIY---N-----E-TNIDTSFASTRQS--NC  
 MtPrx55 159 PABTFNLSQLQOSFSQKGLSLQDLVALSGGHTLGFACSSSQNRRIH---KFSPKQA---VD-PSLNPSFASNLQS--KC  
 MtPrx56 163 PNHNDISSVLISSFOAIGIDVEATVALLGAHSVGRVHGMNVLVHRLY-----PTV-----D-PTLDPTHAAYLKR--FC  
 MtPrx57 162 PSFFSILSLTTFMSAKGLTASDLTVLVALSGAHTIGQGEQCFRNRRIY---N-----E-TNIDTNFATLRKS--NC  
 MtPrx58 163 PSFFFELENITAKFISKGLEKKDVAVLVALSGAHTIGFAQCFTFKPRLF---DFGGSGK---SD-PSLDSLLQNLQK--VC  
 MtPrx60 168 PSFESISWQESLAYFKSKGLNVLDMTILLGAHTLGGTHCSYIVDRLY---NYNGTGN---SD-PSMDATFRDILRG--IC  
 MtPrx61 168 PAFSLNDGLIATFARKNFTALEMVTLVALSGAHTIGLACTSFRGRRIY---N-----E-TNIDPSFAESKRL--IC  
 MtPrx63 162 PRPSFNTRLTTFMLAKGLTASDLTVLVALSGAHTIGQGEQCFRNRRIY---N-----E-TNIDTNFATLRKS--NC  
 MtPrx64 213 PSFYALLTQTRASFKSRGFDEREMVTLGAHSIGVIFCKFFENCY---NFSGTNE---PD-PSLDTQFLNVLRS--KC  
 MtPrx65 169 PPTFSAEQLIDNFDKGLSVDVEMVTLGAHSIGVSHCSSFSKRLY---SFNLTFP---QD-PSMDPNFARILKS--KC  
 MtPrx66 153 PSLEFVSVHRQKFAAKGLNDHDLVTLGAHTIGQTIICRFFSYRLY---NFTTTGN---AD-PTINQAFLAQLKA--IC  
 MtPrx67 161 PKFTDILLTTLIAHFTNKGLTLKDMVTLVALSGAHTIGCAQCFTFRDRIY---N-----NASIDAGFASTRRR--GC  
 MtPrx70 165 PEEFFNLSQLITNEKSHGLNLKDLVVLVSGGHTIGFSKCTNFRNRRIY---N-----D-TNIDTNFANLQK--TC  
 MtPrx71 166 PAFFFLNLSLTKSSFAAQGLNTVDLVALSGAHTIGRARCSSLFVDRLY---NFSNTGE---PD-PTLDITVLLKQLQN--EC  
 MtPrx74 182 PRANSTVDELKIFENSKGLTIQDMVALSGAHTIGFAHCKNFLTRLY---NYRGKQ---PD-PDNPKLLKALRM--YC



```

MtPrx75 173 EVEFARTIDELLTVEGSKKFDATDVVALSGAHTFGCAHCPTMFNRVI--D-----SD-EPTEPNFKKQLEA--TC
MtPrx76 161 ELFTDDLTTLISHFNKKNLTPRDMVTLGSAHTIGCAQCFTFRGRIY---N-----NASDI DAGFANTRQR--GC
MtPrx78 155 PGFFSNVSOALNFFTSKGLTLEDMVTLGSAHTIGFAKCIFFQSRIS---SFNGN----ID-PTMDPNLDAFIVE--KC
MtPrx79 173 PKPSMTMTQIVSIFTKRGETVEEMVALSGAHTVGFSSHCEISSDIY---N--NSSG---SG-SGYNPRFVEGLKK--AC
MtPrx81 166 PGPAFSLSQLIKNFDNKGINEKDLVALSGAHTIGFSRCLLFRDRIY---N-----D-KNIDANFAKQLQD--IC
MtPrx82 195 BRDDNITRTLHLFNLRGFKARETVSLLGEHNIGKIGCDFIQORLY---DFQGTGQ---PD-PSIPLIFLSQMRQ--NC
MtPrx83 212 EPMNWPMEKMDLFTKKGFTEEMVILLGAHSIGVAHCDVFMERTY---NYADTRK---PD-PLPFPPIVNEIQQ--IC
MtPrx84 165 EAPTSLNLTLSMFSAVGLSSKDLVTLGSAHTIGCARCTNFRARIY---N-----E-TNINAFASTRQS--NC
MtPrx85 175 PGENSTVDMLVAKFENVGLTLQDMVALSGAHTIGKARCSTFSSRLR---SNSVS---DG-PYVNAEFVSSLKR--IC
MtPrx86 165 EPAFFNFSQLIANFQSQGLNLKDLVWLSGGHTIGFSRCTNFRSRIY---N-----D-TNINTNFAANLQK--TC
MtPrx87 169 EPFTFSAEQLIDNEDRKGLSVDEMVTLSGAHSIGVSHCSSEFSKRLY---SFNATFP---QD-PSMDPDPARLLRS--KC
MtPrx88 156 PGPESSTISQTLQAFKSKGMTLEEMVTLLGAHTVGFVAHCSFIGKRL-----GS---ND-SSMDPNLRKRLVQ--WC
MtPrx89 154 PGNIPIGALSQFFAAKGITTEEMVTLLGAHTVGVVAHCGFFASRLS---SVRGK----PD-PTMDPALDTKLVK--IC
MtPrx90 163 EAPNSSLETLINNFKQQGLDIEDLVVLSGSHITIGPARCLSFQRRIYETKOEYHHAYD---R-YKRYTTERRILQS--IC
MtPrx91 161 ELPTMTNSQVIDIFTSKGETVQEMVALGSAHTIGFSHCKQFSNRLE---NFSKTTE---TD-EKYNPEYAAGLKK--IC
MtPrx92 161 ESESFNISQLQKSEFSQRGLSMEDLVALSGGHTLGFSSHCSSEFRNRH---NFDATHD---VD-PSINPSFASKLKS--IC
MtPrx93 166 ESPTVTVDEEFLSIFKSKGMNIQESVAIILGAHTLGVGHCLSIVGRLY---N-QNQQI-----G-NMNLGNETSLRL--AC
MtPrx94 177 ESFRANASTLIDLQRFNLTVKDLVALSGSHSIGQGRCFSIMFRLY---NQSGSGK---PD-PALDPAFRLELDK--IC
MtPrx95 165 ESFRTNATALITLFQKYNLSVKDLVALSGSHSIGKARCFSIMFRLY---NQSGSGK---PD-PAIDHVFRAELDK--IC
MtPrx97 162 ESFFSDLSTLTKMFTDKGLTASDLTVLGAHTIGQGECCQFFRNRIY---N-----E-TNIDTNFATLRKL--NC
MtPrx98 165 EAPTSLNLTLSMFSAVGLSSKDLVTLGSAHTIGCARCTTFRARIY---N-----E-TNIDTSFASTRQS--NC
consensus 401 p p l li F hglT dlvalsgahtiG arC f rly n d psid fa l C

```

|          |     |                                                      |
|----------|-----|------------------------------------------------------|
| MtPrx01  | 232 | -PR-N--G--G-----DNN--ITFL-----DF-T--P-TRVENTYYRLL    |
| MtPrx02  | 228 | -PK-I--G--G-----DDN--LAPF-----DS-T--P-NKVDTSYYKALL   |
| MtPrx03  | 230 | -PL-H--G--G-----DDN--FEAL-----DFLT--P-QVFDNSYYKNLV   |
| MtPrx04  | 229 | -QG-L--S--D-----TTT--TVEM-----DPNS--S-TTFDNDYYPVLL   |
| MtPrx05  | 256 | -KN-I--N--D-----NTT--IVEL-----DPGS--R-NTFDLGYYSOVV   |
| MtPrx06  | 229 | -PQ----N--S-----GAT-N-RIAL-----DTGS--Q-NKFDNSYYANIR  |
| MtPrx07  | 233 | -PQ-G--N--T-----NQN--L-VVPM-----DPSS--P-GTADVGYNDIIL |
| MtPrx08  | 228 | -PL-K--N--K-----AKN--AGTT-----MDPS--A-TNFDNTYYKLL    |
| MtPrx09  | 233 | -PQ-T--G--D-----GNT--TAVL-----DRNS--T-DLFDNHYYKNLL   |
| MtPrx10  | 236 | -PN-G--G--P-----PNN--LANF-----DPTT--P-DKFDKNYYSNLQ   |
| MtPrx100 | 252 | -RW-----S-----AS-E-YVDL-----DATT--P-KKFDRMYYINLE     |
| MtPrx107 | 230 | -PI----N--A-----QPS-V-AVNI-----DPET--S-MLFDNQYYRNLL  |
| MtPrx11  | 236 | -PN-G--G--P-----GTN--ITNF-----DPTT--P-DKFDKNYYSNLQ   |
| MtPrx110 | 226 | -PS-S--S-TTSN-----DQK--LAAL-----DLVT--P-NSFDNMYFKNLI |
| MtPrx111 | 231 | -PQ-N--G--T-----GNN--ITNL-----DLTT--P-NQFDNKIFYSNLQ  |
| MtPrx114 | 230 | -PI----N--A-----QPS-V-AVNI-----DPET--S-MLFDNQYYRNLL  |
| MtPrx116 | 217 | -K-----S--N-----VDG--ATEL-----DQNT--S-FVIDQEIYKQIL   |
| MtPrx12  | 247 | -PN-G--G--P-----GTP--IASF-----DPTT--P-DKFDKNYYSNLQ   |
| MtPrx13  | 232 | -PK-P--N--N-----NQN--AGQF-----LDST--A-SVFDNDYYKQLL   |
| MtPrx14  | 231 | -PI----R--V-----DPR-I-AINM-----DPVS--P-QKFDNQYFKNLI  |
| MtPrx15  | 236 | -PN-G--G--P-----GST--ITDL-----DPAT--P-DTFDSAYYSNLR   |
| MtPrx16  | 236 | -PQ-N--G--P-----GNN--VVNF-----DPTT--P-DKFDKNYYSNLQ   |
| MtPrx17  | 236 | -PQ-N--G--T-----GNN--RVNF-----DPTT--P-DTLDKNEYYNLI   |
| MtPrx18  | 243 | -KK-----S-----DL-D--IVHL-----DVIT--P-RTFDITYYTNLK    |
| MtPrx19  | 237 | -----T--S-----GDN--AEQP-----FDAT--R-NDFDNVYFNALL     |
| MtPrx20  | 235 | -PN-G--G--P-----GTN--ITNF-----DPTT--P-DKFDKNYYSNLQ   |
| MtPrx21  | 226 | -PK----D--G-----DVN--I-RLAM-----DEGS--D-LKFDKSIKKNIR |
| MtPrx22  | 231 | -PK-T--SGS-G-----DNN--LAPL-----DLAT--P-TSFDNHYYFKNLV |
| MtPrx23  | 277 | -PQ-N--G--S-----GNT--LNNL-----DPSS--P-NNFDNMYFKNLL   |
| MtPrx24  | 246 | -PR-N--G--G-----DNN--LANL-----DSTT--P-AFFDSAYYRNLL   |
| MtPrx25  | 237 | -PR-S--G--G-----DQN--LFFL-----DYVT--P-TKFDNMYFKNLL   |
| MtPrx26  | 236 | -PN-G--G--P-----GTN--ITDL-----DPTT--P-DTFDSNYYSNLQ   |
| MtPrx27  | 234 | -PQ-D--G--D-----GNT--TTVL-----DPYS--F-DFDNNYYFKNLL   |
| MtPrx28  | 225 | -PT-S--G--G-----DIN--LAPL-----DSVS--P-VTFDNNYYNLI    |
| MtPrx29  | 231 | -PR-K--SGTIK-----DNN--VAVL-----DFKT--P-NHFDNLYYKNLI  |
| MtPrx30  | 232 | -PQ-N--S--T-----GNN--LANL-----DLTT--P-NHFDKNYYSNLQ   |



|         |     |                                                                     |
|---------|-----|---------------------------------------------------------------------|
| MtPrx32 | 248 | -PK-S--G--G-----DNN--LASF-----DATI--P-NFFDNAYYRNLL                  |
| MtPrx33 | 224 | -PR-T--G--G-----DLN--LSPL-----DTTS--P-NTFDNAYFKNLQ                  |
| MtPrx34 | 226 | -PR-S--G--N-----DNV--LEPL-----DHQT--P-THFDNLYFKNLL                  |
| MtPrx35 | 237 | -PDIG--V--L-----GTN--LTNL-----DVST--P-DTFDSNYYSNLQ                  |
| MtPrx36 | 220 | -PT-T--G--G-----DDN--LSPL-----DTTT--P-NTFDNSYFQNLQ                  |
| MtPrx37 | 226 | -PR-S--G--N-----DNV--LEPF-----DYQT--P-THFDNLYFKNLL                  |
| MtPrx38 | 232 | -PR----N--V-----DPR-I-AINM-----DPTT--P-RTFDNVYYKNLQ                 |
| MtPrx39 | 226 | -PF-E--G--G-----DDN--FSPF-----DSSKPEA-HDFDNGYYQNLV                  |
| MtPrx40 | 240 | -PPI-G--G--G-----DNN--ITAM-----DYVT--P-NLFDNSFYQILL                 |
| MtPrx41 | 228 | -PR----N--V-----DFN-I-VLAL-----DTQT--E-HTFDNLYYKRLV                 |
| MtPrx42 | 237 | -PR----N--V-----DPR-V-AVDM-----DPVT--P-HAFDNVYFKNLQ                 |
| MtPrx43 | 225 | -PL-S--G--G-----DTN--LAPL-----DSVS--P-VTFDNNYYRLLV                  |
| MtPrx44 | 226 | -PT-S--G--G-----DTN--LAPF-----DSVT--P-TKFDNYYKILLI                  |
| MtPrx45 | 253 | -PR-S--G--G-----DNI--ISPL-----DFGS--P-RMFDNTYYKILL                  |
| MtPrx46 | 237 | -PR-S--G--G-----DQN--LFVL-----DFVT--P-VKFDNYYKNLL                   |
| MtPrx47 | 233 | -PD-S--I--P-----DPKAVQYVRN-----DRGT--P-MILDNNYYRNIL                 |
| MtPrx48 | 240 | -PN----A--N-----SGN--TANL-----DIRT--P-ATFDNKYYLILM                  |
| MtPrx49 | 229 | -PR-E--G--G-----DSN--LAPL-----DSVT--S-AKFDVAYYSQLI                  |
| MtPrx50 | 239 | -PP-P--P--S-----NTN-P-IVML-----DVAT--P-NRLDNLYYEGLI                 |
| MtPrx52 | 233 | -PNQA--D--S-----DSN--LAPL-----DPVT--T-NTFDNTYYKRVL                  |
| MtPrx53 | 234 | -KN-I--N--D-----QTT--LIEM-----DPGS--R-NTFDLGYFKQVV                  |
| MtPrx54 | 228 | -PK-T--SGS-G-----DNN--LAPL-----DLHT--E-TSFDNCYYRNLV                 |
| MtPrx55 | 229 | -HI-K--N--K-----VKN--SGSP-----LDST--A-TYFDNAYYKILL                  |
| MtPrx56 | 228 | -PT-P--N--P-----DPKAVQYVRN-----DLKT--E-MIIDNNYYKNIL                 |
| MtPrx57 | 225 | -PL-S--G--G-----DTN--LAPL-----DTLT--E-TSFDNYYKNLV                   |
| MtPrx58 | 233 | -PNQA--D--S-----DTN--LAPL-----DPVT--S-NTFDNTYYRNVL                  |
| MtPrx60 | 238 | -PPRTKKGQ--S-----DPL-V-YLNP-----DSGK--N-YIFRESYYKRIL                |
| MtPrx61 | 231 | -PF-N--G--G-----DNN--ISTL-----SNS--S-INFNTYYNILLV                   |
| MtPrx63 | 225 | -SF-S--S--DN-----DTN--LAPL-----DTLT--E-TSFDNYYKNLV                  |
| MtPrx64 | 283 | -NE-T--D--A-----LST--SASA-----YSSHASPSLVEEQEITTDSGE--SLSNFGTLYYRILL |
| MtPrx65 | 239 | -PP-P--Q--S-----QSIN-P-TVVL-----DGST--P-NDLDNMYRRLK                 |
| MtPrx66 | 223 | -PK----N--G-----DGL-R-RVAL-----DKDS--P-AKFDVSEFFKNVR                |
| MtPrx67 | 225 | -PS-L--SSTN-----NOK--LAAL-----DLVT--P-NSFDNYYFKNLI                  |
| MtPrx70 | 228 | -PK-I--G--G-----DDN--LAPF-----DS--T--P-SRVDTKYYKILL                 |
| MtPrx71 | 236 | -PQ-N--G--P-----GNN--RVNF-----DPTT--P-DTLDKNEYNNLQ                  |
| MtPrx74 | 252 | -PN-F--G--G-----NTD-I-VAPF-----DATI--P-FIFDHAYYGNLQ                 |

```

MtPrx75 237 -PN-----E--E-----SLN--AVNL-----DVRT--P-NTFDNMYYNLL
MtPrx76 225 -PS-S---RTTSN-----DQK--LAAL-----DLVT--P-NSFDNMYFKNLI
MtPrx78 223 -GS-----R--G-----NET--SVFL-----DQKT--P-FDFDNEEYFNQIV
MtPrx79 241 -GD-Y--K--K-----NPT-L-SVFN-----DIMT--P-NKFDNVYEQNLP
MtPrx81 229 -PR-E--G--G-----DSN--LAAL-----DCVT--P-AKFDEAYYMELI
MtPrx82 265 -ED-N--N--K-----NNV--SSNGMFSTFTVSKPMNVHHSSNNKGMSYKQALSSAVSS--G-ASFDTHYQQLL
MtPrx83 282 -AN-P--G--T--PLF--RNP--VVNF-----DET--P-ALLDNLFFKNMV
MtPrx84 228 -PK-A--SGS-G--DNN--LAPL-----DLQT--P-SSFDNMYFKNLV
MtPrx85 243 -SG-Q--D--N-----SNR--IAHL-----DLVT--P-ATFDNQYYNLL
MtPrx86 228 -PR-I--G--G-----DDN--LAPF-----DS--P-SRVDTKYYKALL
MtPrx87 239 -EP-P--Q--SQSQSQIQNLD-S-TVAF-----DGST--P-NDLDNMYYKELK
MtPrx88 220 -GV----E--G--KDP--LVFL-----DQNT--S-FVFDHQFYNQIL
MtPrx89 222 -K-----S--N-----SDG--AAFL-----DQNT--S-FTVDNEEYKQIL
MtPrx90 236 -EV-T--G--R-----DDK--FAPL-----DFCT--P-KRFDNQYFNII
MtPrx91 231 -QN-Y--Q--K-----DTS-M-SAFN-----DVMT--P-SKFDNMYFKNIK
MtPrx92 231 -PI-I--N--Q-----VKN--AGTT-----LDAS--S-TTFDNTYYKILL
MtPrx93 234 -PT-V--I--P-----MTN-LTFVPN-----DM--P-TIFDNQYYRDIM
MtPrx94 247 -PL-D--V--D-----QNK--TGNL-----DST--P-VIFDNQYFRILV
MtPrx95 235 -PR-D--V--D-----QNK--TGNL-----DAT--P-VIFDNQYFRILV
MtPrx97 225 -PL-S--G--G-----DTN--LAPL-----DTLT--P-TNFDNMYYNLV
MtPrx98 228 -EN-T--SGS-G--DNN--LAPL-----DLQT--P-TSFDNMYFKNLV
consensus 481 p n 1 1 d t p fdn yyrnll

```



MtPrx01 260 -YKRGVLSHSDQCLEF-K---GQ---GSESDKIVQIYSKNT-F-----AFASDFKTSLIKMGN-I-KPLTG-RQ-GEIRLNC  
 MtPrx02 256 -YKRGVLSHSDQCLEF-K---GD---GSCSDRIVQIYSKNS-Y-----AFAYDFGVSMIKMGN-I-KPLTG-KK-GEIRCNC  
 MtPrx03 259 -SKIGLIFHSDQCLEF-K---GD---GSESDMIVEIYSRDS-D-----AFARDFKASMIKMGN-I-KPLTG-NF-GEIRTYC  
 MtPrx04 258 -QNKGLFSDAAILL-T---TK-Q---SRNIVNELVSON-----KFFTEFSQSMKRMGA-I-EVLTG-SN-GEIRKRC  
 MtPrx05 285 -KRRGLFESDSALL-T---NS-V---TKALVTCQLQGSLE-----NFYAEFAKSTIEKMGQ-I-KVKTG-SQ-GVIRKHC  
 MtPrx06 258 -NGRGLIQSDQALL-N---DA-S---TKTFVQPYLG-L-RGLLGLTENVEFCNSMVKMSN-I-GVKTG-VD-GEIRKIC  
 MtPrx07 263 -ANRGLFSDQILL-T---NT-G---TARKVHQNARNP-Y-----LWSNKFATAMVKMGQ-V-GVLTG-NA-GEIRINC  
 MtPrx08 257 -QQKGLFSDQALL-D---SP-K---TKQIVSKFASQ-K---AFFDAFAKSMIKMSS-I-N---G-GQ-EVRKIC  
 MtPrx09 262 -NGKGLLSHQDILLI-S---TD-EANSTSKPLVQSINDNA-T-----LFFGDFVKSMIKMGN-I-NPKTG-SD-GEIRKSC  
 MtPrx10 265 -GKKGLLSHQDILE-S---TS---GADTISIVNKFASADK-N-----AFEDSFEAMIKMGN-I-GVLTG-KK-GEIRKHC  
 MtPrx100 278 -KKMGLLITDQILY-S---DP-R---TSQIVSALTT-----SS-VFHFQFAVSMKFGV-I-DVLTGDDE-GEIRINC  
 MtPrx107 259 -DRKVLFEQSDSVLM-N---ND-D---TRKIVELFANDQ-E-----LFFDNWGVSEVKLIS-I-GVKTG-EE-GEIRKSC  
 MtPrx11 265 -VRKGLLSHQDILE-S---TS---GSDTISIVNKFATDQ-K-----AFESFEKAMIKMGN-I-GVLTG-KQ-GEIRKOC  
 MtPrx110 258 -QBKGLLSHQDILE-S-G-GS-----TNSFVSEYSNNP-T-----TEKSFATAMIKMGD-I-EHVTG-SA-GVIRKIC  
 MtPrx111 260 -SHKGLLSHQDILE-S---TP---NADTIAIVNSESNNQ-A-----LFFENFRVSMIKMAN-I-SVLTG-NE-GEIRLQC  
 MtPrx114 259 -DRKVLFEQSDSVLM-N---ND-D---TRKIVELFANDQ-E-----LFFDNWGVSEVKLIS-I-GVKTG-EE-GEIRKSC  
 MtPrx116 244 -LKRGLIQIDQKLT-L---DK-S---TSLEFVSNFASNG-E-----KRVNMFATAMIKMGK-I-GLLIG-NE-GEVRKNC  
 MtPrx12 276 -VRKGLLSHQDILE-S---TS---GADTISIVNMFATDQ-K-----AFESFEKAMIKMGN-I-GVLTG-NQ-GEIRKOC  
 MtPrx13 261 -AGKGVFSDQSLV-G---DY-R---TRWVEAFARDQ-S-----LFFKFAASMIKMGN-I-R---G-SDN-GEVRLNC  
 MtPrx14 260 -QGKGLFSDQVLE-T---DS-R---SKATVNLFASNP-K-----AFESAFINAITKIGR-V-GVKTG-NQ-GEIRKIC  
 MtPrx15 265 -IQKGLFEQSDQVLS-S---TS---GADTIAIVNSESNNQ-T-----LFFEAFAKSMIKMSR-I-KVLTG-SQ-GEIRKOC  
 MtPrx16 265 -GKKGLLSHQDILE-S---TP---GADTISIVNMFANNQ-N-----VFQNFINSMIKMGN-I-GVLTG-KK-GEIRKOC  
 MtPrx17 265 -GKKGLLSHQDILE-S---TP---GADTISIVNMFANSQ-N-----VFQNFINSMIKMGN-I-DVLTG-KK-GEIRKOC  
 MtPrx18 269 -RKAGLLSITDQILE-S---DK-R---TSPFVDIFAT-----QPFVFTSQFAVSMVKLGN-V-QVLTG-PNE-GEIRVNC  
 MtPrx19 263 -RKNGLVLSHQDILY-S---SP-R---TRNIVNAYAMNQ-A-----MFLDFQCAMVKMGL-I-DIKQG-SN-GEVRSNC  
 MtPrx20 264 -VRKGLLSHQDILE-S---TS---GADTISIVNKFESTDQ-N-----AFESFEKAMIKMGN-I-GVLTG-TK-GEIRKOC  
 MtPrx21 255 -EGFAVLASDARLN-D---DF-V---TKSVIDSYFNPI-NPTFGPSEENDFVQSMVKMGQ-I-GVKTG-SV-GNIRRVIC  
 MtPrx22 262 -DSKGLLSHQDILE-N-G-GS-----TDSIVHEYSLYP-S-----SFSDFVTAMIKMGD-I-SPLTG-SN-GEIRKOC  
 MtPrx23 306 -KNGGLLQIDQELE-S---TN---GADTISIVNMFANSQ-T-----AFEEAFVQSMINMGN-I-SPLIG-SQ-GEIRKIC  
 MtPrx24 275 -FKRGLLSHQDILE-N-G-GS-----TDYKVLAYARNP-Y-----LFRFDFAKAMIKMGN-I-SPLTG-NQ-GQIRKYC  
 MtPrx25 266 -AYKGLLSDEILL-T---KN---QESAELVKLYAERN-D-----LFFEQFAKSMIKMGN-I-SPLTG-SR-GNIRKNC  
 MtPrx26 265 -VGNGLFEQSDQELE-S---TN---GSDTISIVNMFANNQ-T-----LFFENFVSMIKMGN-I-GVLTG-SQ-GEIRKOC  
 MtPrx27 263 -NGKGLLSHQDILE-S---SDEETTSTKQIVQYSENE-R-----IFRMBFAYAMIKMGN-I-NELTG-SE-GEIRKSC  
 MtPrx28 254 -ANKGLLSHQDILE-N-GVGS-----QVSLVRYTSRNN-I-----AFKRFATAMVKMSR-I-SPLTG-TN-GEIRKNC  
 MtPrx29 263 -NRKGLLSHQDILE-N-G-GS-----TDSIVKYSYNNQ-N-----AFESFATAMIKMGN-N-KPLTG-SN-GEIRKOC  
 MtPrx30 261 -NLNGLLSHQDILL-S---TP---NADTIAIVNSESNNQ-S-----LFFLNFRVSMIKMAN-I-GVLTG-DE-GEIRLQC

MtPrx32 277 -NKGLLHSDQQLN-N-G-GS-----TDYKVSAYYNNP-L-----LFSIDFANAMIKMGN-I-SFLTG-DQ-GQIRKNC  
 MtPrx33 253 -NQKGLFHSQVLE-D-E-VT-----TKSQVNSYVRNP-L-----SPKVIDFANAMEKMAN-I-GFLTG-SS-GQVRKNC  
 MtPrx34 255 -ANKGLLHSDQCLE-N-G-SS-----TDNLVRKYITDN-A-----KFFKAFKAGMVKMSS-I-KFLTG-SN-GQIRKNC  
 MtPrx35 267 -AGNGIFQSDQCLE-S---TP---GADTIAIVNSESSNQ-T-----LFFEFKASMIKMG-N-I-GVLTG-TQ-GEVRTHC  
 MtPrx36 249 -SQKGLFSSDQALE-N-G-GS-----TDSIVDEYSSDS-S-----SEATIDFANAMVKMGN-I-NFLTG-SN-GQIRKNC  
 MtPrx37 255 -AKKILLHSDHELE-NIG-SS-----TNNLVRKYATNN-A-----EFFKAFKAGMVKMSSS-I-KFLTG-SN-GQIRKNC  
 MtPrx38 261 -QKGLFTSDQILE-T---DT-R---SRNTVNSFATNG-N-----VENANFITAMIKLGR-V-GVKNA-RN-GKIRKNC  
 MtPrx39 257 -KSKGLIHSQCLEGN-G-TS-----TNAQVRPYSRNF-G-----RFKKIDFALAMEKMSM-L-SFLTG-TE-GEIRKNC  
 MtPrx40 270 -KGEGLNSDQEMY-S---SV-F-GIEIRELVKKYADS-L-----AFFQCFSDSMVKMGN-I-TNSESFIT-GEVRKNC  
 MtPrx41 257 -NGKGLSSDQVLE-T---DD-A---SRSTVVEFANDG-S-----KFFKAFVVAIKKIGR-V-GVKTG-KE-GEIRKNC  
 MtPrx42 266 -KGKGLFTSDQVLE-T---DS-R---SKAAVNAFASSN-K-----IFHANFVAAMIKLGR-V-GVKNS-HN-GNIRKNC  
 MtPrx43 254 -ANKGLLNSDQALE-N-GVGS-----PVSIVRAYSING-F-----AFRRDFAFAMVKMSR-I-SFLTG-TN-GEIRKNC  
 MtPrx44 255 -ANKGLLHSDQVLE-N-GGGS-----QISLVRKYSRDG-A-----AFSRDFAAAMVKMSK-I-SFLTG-TN-GEIRKNC  
 MtPrx45 282 -RGKGLLNSDEVLL-T---GS-V---KETRDLVKKYEQDE-S-----LFFQCFALSMIKIGN-I-RFLTG-FN-GEVRKNC  
 MtPrx46 266 -ANKGLSSDEILL-T---KN---QVSADLVKKYAESN-D-----LFFEQFAKSMVKMGN-I-TFLTG-SR-GEIRKNC  
 MtPrx47 265 -DNKGLLIVDHOLA-H---DK-R---TKPYVKKMAKSQ-E-----YFFKBFSPAITLLSE-N-NFLTG-TK-GEIRKNC  
 MtPrx48 268 -NKQGLFTSDQDLN-I---DS-R---TKGLVNDFAVNO-G-----LFFKQFVNAEIKVSO-I-NVLVG-NQ-GEIRKNC  
 MtPrx49 258 -KKKGLLHSDQELL-K---GG-----YTGALVRKYRRT-R-----TFYKIDFAKSMIKMGN-I-KFLTG-KQ-GEVRYNC  
 MtPrx50 269 -NHRGLLTSQDILL-S---SQ-S---TQESVLSNANYG-S-----NWTAKFAQAMVHMGS-I-DVLSG-YD-GEIRKNC  
 MtPrx52 263 -SNSGLLQSDQALL-G---DN-----TTSALVTNYSKWP-I-----LFFRDFAVSVEKMGR-I-GILAG-QQ-GQIRKNC  
 MtPrx53 263 -KRRGLFQSDAALL-K---SS-T---TRSDLAQHLQSN-E-----KFFTEFGRSMEKMGR-I-NVKIG-TE-GEIRKNC  
 MtPrx54 259 -QNKGLLHSDQCLE-N-G-GS-----TNSIVSGYFNNQ-N-----SFFSDFATAMIKMGD-I-KFLTG-SN-GEIRKNC  
 MtPrx55 258 -QKGLLTVDEELA-T---HP-T---TKALVSKYAHSQ-M-----EFFERAFVKSMIKMSS-ITN---G-GK--QIRKNC  
 MtPrx56 260 -QHKGLLTVDEELA-T---DP-R---TSPYVKKMADN-G-----YFNEQFSRAVQLLSE-N-NFLTG-DQ-GEIRKNC  
 MtPrx57 254 -ASKGLFHSQALE-N-N-GS-----QDNIVRSYSTNG-A-----TFSRDFAVAMVKLSK-I-SFLTG-TN-GEIRKNC  
 MtPrx58 263 -SNSGLLQSDQALL-G---DS-----TTASLVNYYSKWP-I-----LFFRDFAVSVEKMGR-I-GVLTG-QQ-GQIRKNC  
 MtPrx60 272 -RNEAVLIGIDQALL-F---GD-D---TKELTEEFAGF-E-----DFRRSFAQSMKMG-N-I-KVLTG-NQ-GEIRKNC  
 MtPrx61 259 -SKKGLLHSDQQLL-N-G-LS-----TSNOVIAYTIDN-E-----SEKRIDFANVMIKMGM-I-SFLTG-SD-GQIRKNC  
 MtPrx63 255 -ASKGLFHSQVLE-N-N-GS-----QDNIVRSYSTNE-A-----AFSTIDFAAMVKLSK-I-SFLTG-TN-GEIRKNC  
 MtPrx64 332 -QKGLIYEDQQLM-E---GE-K---TRYWVQ-YASNR-T-----LFHQDFALAMKLSD-I-RVLTG-PM-GQIRKNC  
 MtPrx65 270 -NHRGLLTSQDILL-N---SG-L---TRRVVLKNARHA-A-----LWNVKFAKAMVHMGS-I-DVLTG-SE-GEIRKNC  
 MtPrx66 252 -DGNGLLESQRLW-E---DS-A---TRRVVENYGGNF-RGLLGLRDFEFKAMIKLSS-V-DVKTG-ID-GEIRKNC  
 MtPrx67 257 -QNKGLLQSDQVLE-G-GGGS-----TDSIVSEYSKNP-T-----TFKSIDFAAMIKMGD-I-QFLTG-SA-GIIRKNC  
 MtPrx70 256 -NKQGLLHSDQCLE-K---GD---GSDRIVQILYSKNS-Y-----AFAYDFGVSMIKMGN-I-KFLTG-KK-GEIRKNC  
 MtPrx71 265 -VKKGLLQSDQCLE-S---TP---NADTTSIVNPFANNO-S-----AFFESFKKAMIKMGN-I-GVLTG-KK-GEIRKNC  
 MtPrx74 282 -NKMGLLASDQALA-L---DP-R---TKSLVQDFAKDK-Q-----KFFQAFASAMDKMSL-V-KVVRG-KKHGEIRKNC



```

MtPrx75 265 -NHQGVFTSDQDLA-S---HP-K---TKETVNLFASNQ-K----EFFNKFANAFVKVVSQ-I-DVLTG-NQ-GEIRKSC
MtPrx76 257 -QKKGLLQSDQVLE-S-G-GS----TDSIVSEYSNNP-T----TFKSDFAAAMIKMGD-I-EPLTG-SA-GIIRSIC
MtPrx78 251 -NKRGILOIDQOLA-L---DP-I---SNVLVWVFASGN-F----NFWERFGVSWSKLAN-L-DVKVG-NQ-GEIRRNC
MtPrx79 271 -KGLGVLKSDHGLE-S---DP-S---TKPFVERFAKDQ-D----YFFKVFASSMQKLSL-I-NVQTG-RK-GEIRFEC
MtPrx81 258 -KKKGLLHSDQELL-N---GD----YTGSIVRKYRRDT-S----AFYNIFAKSMIKMGN-I-KPLTG-SQ-GEIRSNC
MtPrx82 323 -RGRGLLFADQQLM-A---EE-K---TAKLVSAYASDDGS----TFRMDFARVMMKLSN-I-DVLTG-NQ-GQVRLNC
MtPrx83 313 TKKKTLLVTD AHLF-N---DP-R---TIPIVEELAKDN-G----LFQKKFAEAMVKMGs-Y-NVITG-ND-GEVRKTC
MtPrx84 259 -QNKGLLHSDQCLE-N-G-GS----TNSIVSGYSTSP-S----SFSSDFAAAMIKMGN-I-KPLTG-SN-GEIRKNC
MtPrx85 272 -SGEGLLPSDQTLV-N---GN----DQTRQIVETIVANP-F----VFFDDFKNSMVKMGs-I-GTATQ-SI-GQIRRIC
MtPrx86 256 -HKKGLLHSDQELE-K---GD---GSQSDRLVQLYSKHS-H----AFAYDFGVSMIKMGN-I-KPLTG-KN-GEIRCNC
MtPrx87 277 -NNRGLLTSQILV-N---SG-L---TKRMVLKNARHA-A----IWNVKFAKAMVHMGN-I-DVLTG-SQ-GEIREYC
MtPrx88 248 -LGRGVLTIQNLA-L---DS-I---SKGVVTGFARNG-E----NFRERFVDVAVKLG-N-V-DVLVG-NQ-GEIRKNC
MtPrx89 249 -LKRGIHQIDQOLA-L---DK-S---TSTFVSNFASNG-D----KFVKSFAFAMIKMGK-V-GVLVG-NE-GEIRKNC
MtPrx90 265 -EGKGLLGSNDVLI-S---QD-L-DGRIRKQVWGYASNE-K----LFFDSFAKSMIKMGN-I-NVLTG-SE-GEIRRNC
MtPrx91 261 -RGMGLLATDSLME-E---DK-R---TKPFVDMYAENQ-T----KFFEDFGNAMPKLSV-I-HVKEG-KD-GEIRNEC
MtPrx92 260 -QRKGIFFSSQVLI-D---TP-Y---TKDLVSKFATSQ-D----EFYKAFVKSMVKMSS-I-N---G-GQ-EIRKIC
MtPrx93 264 -MGRGLLGIDSSIS-R---DP-R---TAPIVMRFAMDQ-S----YFFENFSSAFVKLSA-S-NVLTN-IQ-GEVRRKC
MtPrx94 275 -GGRGELNSDQTLF-T-Y-PQ-----TKGLVRFYSRDQ-S----EFFKAFVKGMKMGD-I-Q--SG-RP-GEVRRNC
MtPrx95 263 -GGRGELNSDQTLF-T-F-PQ-----TKGFVSLFSEDQ-S----EFFKAFVEGMLKLGD-I-Q--SD-KP-GEVRKNC
MtPrx97 254 -ASKGLFHSDQALE-N-N-GS----QDNLVRSYSTNG-A----TFRRFVAVAMVKLSK-I-NPLTG-TN-GEIRKNC
MtPrx98 259 -QNKGLLHSDQCLE-N-G-GS----TNSIVSGYSTNP-S----SFSSDFATAMIKMGD-I-SPLTG-SN-GEIRKNC
consensus 561  kgll sDq lf          t lv ya          ff fa amikmg i vltg  geiRrnC

```

**Figure S4.** Alignment of *M. truncatula* class III peroxidases (partial sequences) showing in red the conserved residues described in [37]. The alignment was performed with Kalign and the conserved residues were shaded using BoxShade (see Materials and Methods section).

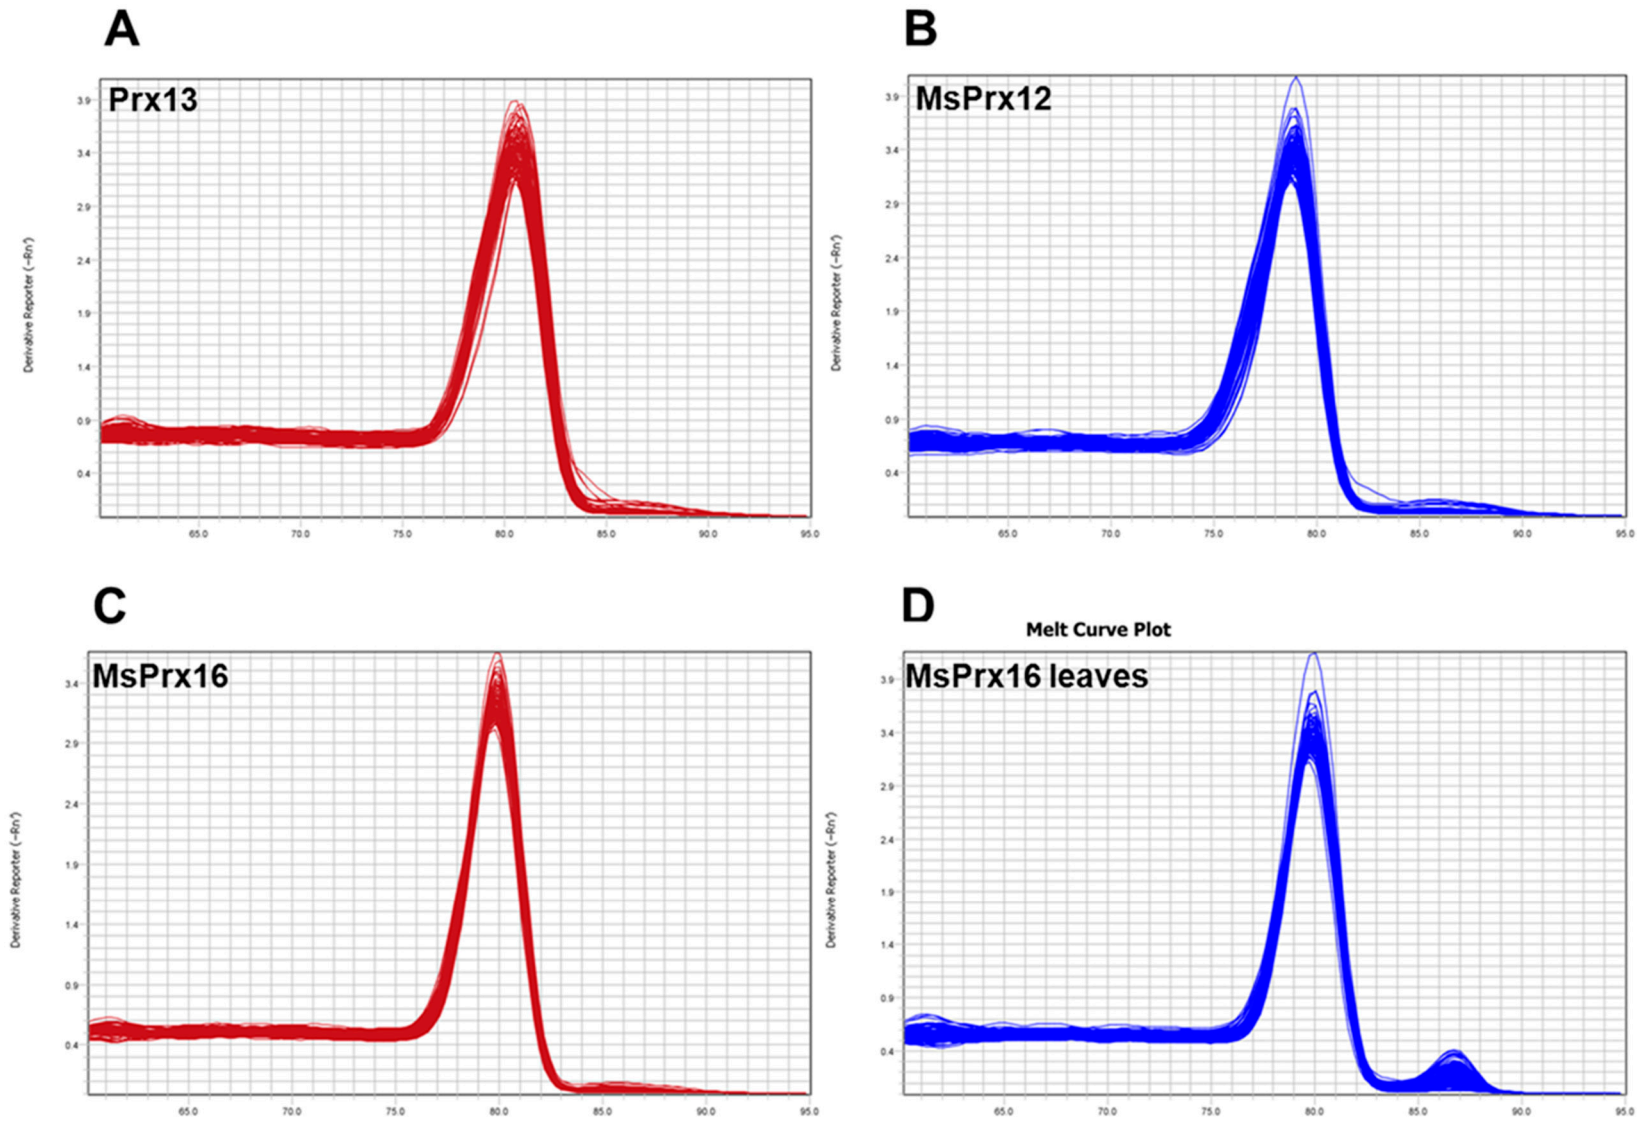

**Figure S5.** Melt curve analysis of the three class III peroxidases Prx 13 (A); MsPrx12 (B); MsPrx16 (C) in roots and stems of alfalfa; In (D) the melt curve analysis of MsPrx16 in alfalfa leaves shows two peaks, therefore the gene was not retained for study in these organs.



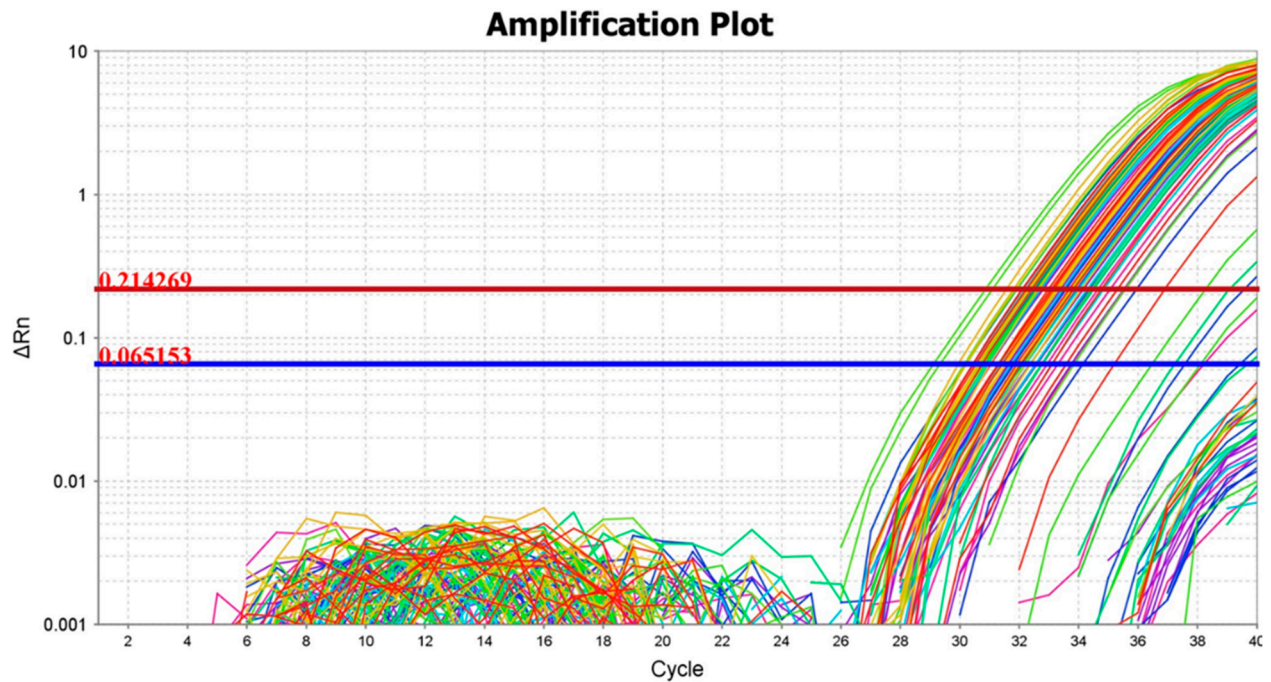

**Figure S6.** Amplification curves for Medtr4g078885.1 in alfalfa roots.

**Table S1.** Characteristics of putative dirigent/dirigent-like proteins from *M. truncatula*. Details concerning the gene accession, the protein length, the subfamily, the localization, the signal peptide (SP) length and the *N*-glycosylation sites are provided. The positions corresponding to putative *N*-glycosylation sites followed by a proline, which are very unlikely to be modified, are indicated in *italics*. “S” is secreted, “other” indicates a localization that is neither chloroplastic, nor mitochondrial, nor apoplastic (as computed by TargetP).

| Gene Accession  | Length | Subfamily | Location | SP (length) | <i>N</i> -Glycosylation |
|-----------------|--------|-----------|----------|-------------|-------------------------|
| Medtr4g122130.1 | 180    | f         | S        | 28          | 6-33-174                |
| Medtr4g122110.1 | 180    | f         | S        | 26          | 6-33-174                |
| Medtr1g056370.1 | 186    | e         | S        | 20          | 88-169                  |
| Medtr7g093850.1 | 194    | b/d       | S        | 28          | 16                      |
| Medtr7g093820.1 | 194    | b/d       | S        | 28          | 16                      |
| Medtr3g034030.1 | 186    | e         | S        | 24          | 56-179                  |
| Medtr7g093830.1 | 193    | b/d       | S        | 27          | 15-132                  |
| Medtr7g093870.1 | 218    | b/d       | S        | 24          | 23-133                  |
| Medtr7g093790.1 | 191    | b/d       | S        | 25          | 130                     |
| Medtr4g049550.1 | 179    | f         | S        | 28          | 31-103                  |
| Medtr5g096120.1 | 189    | b/d       | S        | 22          | 54-64-129-172-183       |
| Medtr3g105630.1 | 189    | b/d       | S        | 23          | 91-112                  |
| Medtr3g105640.1 | 188    | b/d       | S        | 23          | 65-90-111-182           |
| Medtr7g070390.1 | 192    | b/d       | S        | 22          | 62-132                  |
| Medtr4g013770.1 | 192    | b/d       | S        | 23          | 2-59-94-131             |
| Medtr7g021300.1 | 389    | e         | other    | -           | -                       |
| Medtr8g073770.1 | 190    | -         | S        | 26          | 52-90                   |
| Medtr8g073850.1 | 190    | -         | S        | 26          | 52-90                   |

Table S1. *Cont.*

| Gene Accession   | Length | Subfamily | Location | SP (length) | N-Glycosylation |
|------------------|--------|-----------|----------|-------------|-----------------|
| Medtr8g106405.1  | 170    | a         | other    | -           | 39-68           |
| Medtr8g099135.1  | 185    | a         | S        | 21          | 51-64-121       |
| Medtr8g099115.1  | 189    | a         | S        | 21          | 68-143          |
| Medtr8g106450.1  | 180    | a         | S        | 29          | 49-78           |
| Medtr0433s0040.1 | 191    | b/d       | other    | 24          | 7-35-77         |
| Medtr1g046500.1  | 250    | e         | S        | 26          | 51              |
| Medtr1g054525.1  | 192    | b/d       | S        | 26          | 63-134-137      |
| Medtr1g115510.1  | 353    | e         | S        | 32          | 8-58-97         |
| Medtr1g115515.1  | 236    | e         | M        | 28          | 52              |
| Medtr1g046800.1  | 250    | e         | S        | 26          | 51              |
| Medtr4g013345.1  | 196    | b/d       | S        | 22          | 65-79-136       |
| Medtr4g062520.1  | 303    | e         | S        | 32          | 94              |
| Medtr4g062460.1  | 257    | e         | S        | 31          | 68-82-139       |
| Medtr4g013310.1  | 197    | b/d       | S        | 23          | 68-82-139       |
| Medtr4g013330.1  | 199    | b/d       | S        | 25          | 66-139          |
| Medtr4g013350.1  | 197    | b/d       | S        | 23          | 66-80-137       |
| Medtr4g073950.1  | 192    | b/d       | S        | 25          | 60-132-186      |
| Medtr4g013355.1  | 180    | b/d       | S        | 22          | 24-42-72        |
| Medtr4g013325.1  | 199    | b/d       | S        | 23          | 68-82-139       |
| Medtr4g013335.1  | 196    | b/d       | S        | 22          | 67-136          |
| Medtr4g062470.1  | 304    | e         | S        | 31          | 96              |
| Medtr4g078885.1  | 186    | e         | S        | 24          | 179             |
| Medtr4g074020.1  | 99     | b/d       | S        | 23          | -               |
| Medtr4g049570.1  | 178    | f         | S        | 26          | 30-47           |
| Medtr1g046490.1  | 236    | e         | other    | -           | 7-35-77         |
| Medtr4g013320.1  | 199    | b/d       | S        | 22          | 68-82-139       |
| Medtr4g013385.1  | 191    | b/d       | S        | 24          | 44-60-74-130    |



**Table S2.** Expression values  $\pm$  standard deviations relative to the heat map in Figure 2 and retrieved from the *Medicago* eFP browser.

| Tissue      | Medtr4g<br>122130.1 | Medtr1g<br>056370.1 | Medtr7g<br>093850.1 | Medtr7g<br>093820.1 | Medtr4g<br>078885.1 | Medtr7g<br>093830.1 | Medtr7g<br>093790.1 | Medtr4g<br>049550.1 | Medtr7g<br>070390.1 | Medtr8g<br>073770.1 | Medtr1g<br>046500.1 | Medtr1g<br>054525.1 | Medtr4g<br>062520.1 | Medtr4g<br>013320.1 | Medtr4g<br>013385.1 | Medtr4g<br>073950.1 |
|-------------|---------------------|---------------------|---------------------|---------------------|---------------------|---------------------|---------------------|---------------------|---------------------|---------------------|---------------------|---------------------|---------------------|---------------------|---------------------|---------------------|
| Root        | 457.1 $\pm$         | 841.34 $\pm$        | 2503.74 $\pm$       | 614.16 $\pm$        | 280.76 $\pm$        | 614.16 $\pm$        | 1068.5 $\pm$        | 8.39 $\pm$          | 243.23 $\pm$        | 157.59 $\pm$        | 968.42 $\pm$        | 791.6 $\pm$         | 3237.18 $\pm$       | 85.07 $\pm$         | 12734.9 $\pm$       | 3484.67             |
|             | 52.16               | 142.83              | 469.78              | 192.12              | 41.02               | 192.12              | 63.19               | 9.64                | 43.96               | 12.9                | 51.19               | 31.06               | 249.53              | 1.53                | 633.43              | $\pm$ 195.25        |
| Stem        | 6.37 $\pm$          | 8.51 $\pm$          | 2264.75 $\pm$       | 94.12 $\pm$         | 6439.02 $\pm$       | 94.12 $\pm$         | 645.49 $\pm$        | 16.65 $\pm$         | 1004.8 $\pm$        | 420.88 $\pm$        | 31.59 $\pm$         | 3712.7 $\pm$        | 18.24 $\pm$         | 605.5 $\pm$         | 78.1 $\pm$          | 1131.03             |
|             | 1.33                | 8.08                | 543.39              | 15.05               | 414.88              | 15.05               | 44.05               | 0.86                | 95.31               | 47.27               | 11.04               | 196.55              | 11.12               | 36.19               | 45.67               | $\pm$ 91.34         |
| Leaf with   | 33.1 $\pm$          | 32.87 $\pm$         | 227.26 $\pm$        | 41.52 $\pm$         | 1382.79 $\pm$       | 41.52 $\pm$         | 1537.27 $\pm$       | 12.8 $\pm$          | 109.73 $\pm$        | 1065.89 $\pm$       | 43.67 $\pm$         | 7096.96 $\pm$       | 19.19 $\pm$         | 45.5 $\pm$          | 241.64 $\pm$        | 393.18 $\pm$        |
| Petiolules  | 21.38               | 2.22                | 59.28               | 29.85               | 87.38               | 29.85               | 12.81               | 7.22                | 14.28               | 95.95               | 10.87               | 574.28              | 20.77               | 22.39               | 28.35               | 60.55               |
| Vegetative  | 34.6 $\pm$          | 7.92 $\pm$          | 1733.22 $\pm$       | 31.01 $\pm$         | 8153.66 $\pm$       | 31.01 $\pm$         | 346.94 $\pm$        | 6.37 $\pm$          | 452.48 $\pm$        | 358.24 $\pm$        | 7.5 $\pm$           | 3165.97 $\pm$       | 24.77 $\pm$         | 503.5 $\pm$         | 32.38 $\pm$         | 540.19 $\pm$        |
| Bud         | 9.11                | 4.84                | 564.59              | 19.39               | 409.89              | 19.39               | 35.58               | 6.16                | 76.4                | 6.13                | 1.48                | 176.84              | 9.56                | 45.36               | 11.49               | 14.34               |
| Flower      | 78.2 $\pm$          | 14.06 $\pm$         | 263.08 $\pm$        | 53.55 $\pm$         | 575.5 $\pm$         | 53.55 $\pm$         | 465.62 $\pm$        | 45.09 $\pm$         | 967.92 $\pm$        | 213.1 $\pm$         | 22.23 $\pm$         | 2567.76 $\pm$       | 173.03 $\pm$        | 113.97 $\pm$        | 23.35 $\pm$         | 467.92 $\pm$        |
|             | 8.04                | 15.31               | 16.3                | 11.79               | 50.95               | 11.79               | 12.89               | 12.49               | 72.69               | 32.99               | 21.12               | 283.83              | 22.02               | 26.42               | 10.54               | 25.02               |
| Pod         | 29.0 $\pm$          | 23.48 $\pm$         | 245.41 $\pm$        | 35.58 $\pm$         | 660.9 $\pm$         | 35.58 $\pm$         | 322.14 $\pm$        | 1071.18 $\pm$       | 5645.75 $\pm$       | 374.17 $\pm$        | 13.46 $\pm$         | 2270.72 $\pm$       | 56.15 $\pm$         | 465.53 $\pm$        | 16.28 $\pm$         | 936.18 $\pm$        |
|             | 8.5                 | 16.33               | 48.69               | 23.24               | 16.2                | 23.24               | 76.69               | 137.22              | 1142.7              | 49.66               | 10.92               | 324.81              | 12.72               | 48.51               | 10.23               | 89.01               |
| Nodule      | 2141.12 $\pm$       | 82.13 $\pm$         | 3451.47 $\pm$       | 338.52 $\pm$        | 680.17 $\pm$        | 338.52 $\pm$        | 502.83 $\pm$        | 27.23 $\pm$         | 51.76 $\pm$         | 149.31 $\pm$        | 238.94 $\pm$        | 986.46 $\pm$        | 1166.64 $\pm$       | 50.43 $\pm$         | 1425.33 $\pm$       | 5843.43 $\pm$       |
| Mature (4w) | 75.73               | 10.25               | 1054.2              | 180.98              | 201.03              | 180.98              | 31.29               | 16.34               | 13.23               | 27.88               | 17.7                | 184.97              | 246.66              | 8.71                | 278.31              | 348.56              |

**Table S3.** Details of *M. truncatula* peroxidases showing the accession numbers, length, occurrence of XYLAT elements and best hits in *A. thaliana*. Accession numbers and length were retrieved from Phytozome v10.2. MtPrx116 (partial amino acid sequence retrieved from PeroxiBase, no prediction from Phytozome, no EST found) was omitted from the Table. The (+) and (-) signs indicate XYLAT elements on the (+)- and (-)-strand respectively.

| Name    | Gene Accession  | Length<br>(amino acids) | XYLAT             | <i>A. thaliana</i> Best Hit (e value) |
|---------|-----------------|-------------------------|-------------------|---------------------------------------|
| MtPrx01 | Medtr5g074860.1 | 325                     | -                 | AtPrx52 (8e – 121)                    |
| MtPrx02 | Medtr5g074740.1 | 323                     | -                 | AtPrx52 (4e – 114)                    |
| MtPrx03 | Medtr3g467600.1 | 324                     | -                 | AtPrx52 (7e – 111)                    |
| MtPrx04 | Medtr7g107520.1 | 320                     | -                 | AtPrx03 (4e – 120)                    |
| MtPrx05 | Medtr2g088770.1 | 326                     | 1873 (-)          | AtPrx39 (1e – 160)                    |
| MtPrx06 | Medtr2g008710.1 | 325                     | -                 | AtPrx25 (3e – 144)                    |
| MtPrx07 | Medtr3g092990.1 | 327                     | -                 | AtPrx03 (5e – 97)                     |
| MtPrx08 | Medtr5g022870.1 | 316                     | 1061 (-)          | AtPrx64 (3e – 122)                    |
| MtPrx09 | Medtr4g125940.1 | 330                     | -                 | AtPrx59 (3e – 145)                    |
| MtPrx10 | Medtr2g029800.1 | 353                     | 1770 (+)          | AtPrx22 (8e – 129)                    |
| MtPrx11 | Medtr2g029820.1 | 355                     | -                 | AtPrx54 (5e – 132)                    |
| MtPrx12 | Medtr2g029815.1 | 352                     | 111 (+); 1733 (-) | AtPrx54 (2e – 130)                    |
| MtPrx13 | Medtr1g101830.1 | 322                     | -                 | AtPrx66 (1e – 164)                    |
| MtPrx14 | Medtr4g127670.1 | 323                     | 1518 (-)          | AtPrx16 (1e – 173)                    |
| MtPrx15 | Medtr2g029850.1 | 352                     | -                 | AtPrx54 (1e – 125)                    |
| MtPrx16 | Medtr2g029750.1 | 354                     | -                 | AtPrx22 (1e – 127)                    |
| MtPrx17 | Medtr2g029740.1 | 355                     | -                 | AtPrx22 (2e – 130)                    |
| MtPrx18 | Medtr4g133800.1 | 335                     | -                 | AtPrx07 (6e – 105)                    |
| MtPrx19 | Medtr1g077000.1 | 326                     | -                 | AtPrx47 (4e – 169)                    |
| MtPrx20 | Medtr2g029830.1 | 355                     | -                 | AtPrx54 (2e – 130)                    |
| MtPrx21 | Medtr2g008160.1 | 323                     | -                 | AtPrx43 (2e – 147)                    |
| MtPrx22 | Medtr5g083860.1 | 325                     | -                 | AtPrx52 (3e – 161)                    |
| MtPrx23 | Medtr7g093370.1 | 373                     | -                 | AtPrx53 (4e – 166)                    |
| MtPrx24 | Medtr4g029200.1 | 338                     | -                 | AtPrx52 (1e – 122)                    |
| MtPrx25 | Medtr8g076820.1 | 332                     | -                 | AtPrx72 (0.0)                         |
| MtPrx26 | Medtr2g029860.1 | 353                     | -                 | AtPrx54 (3e – 129)                    |
| MtPrx27 | Medtr2g040000.1 | 332                     | -                 | AtPrx59 (2e – 132)                    |
| MtPrx28 | Medtr2g084020.1 | 318                     | -                 | AtPrx52 (6e – 133)                    |
| MtPrx29 | Medtr5g074970.1 | 326                     | -                 | AtPrx67 (1e – 140)                    |
| MtPrx30 | Medtr2g029730.1 | 345                     | 1436 (+)          | AtPrx53 (1e – 127)                    |
| MtPrx32 | Medtr4g029190.1 | 341                     | -                 | AtPrx52 (6e – 118)                    |
| MtPrx33 | Medtr7g072480.1 | 316                     | -                 | AtPrx52 (5e – 95)                     |
| MtPrx34 | Medtr3g072190.1 | 318                     | -                 | AtPrx52 (2e – 126)                    |
| MtPrx35 | Medtr2g029910.1 | 353                     | -                 | AtPrx54 (5e – 129)                    |
| MtPrx36 | Medtr7g072510.1 | 312                     | -                 | AtPrx52 (2e – 131)                    |
| MtPrx37 | Medtr3g072210.1 | 238                     | -                 | AtPrx52 (3e – 91)                     |
| MtPrx38 | Medtr4g095450.1 | 323                     | -                 | AtPrx38 (9e – 162)                    |
| MtPrx39 | Medtr1g115900.1 | 330                     | 1460 (+)          | AtPrx52 (1e – 112)                    |
| MtPrx40 | Medtr5g049280.1 | 338                     | -                 | AtPrx11 (1e – 169)                    |



Table S3. Cont.

| Name    | Gene Accession   | Length<br>(amino acids) | XYLAT            | <i>A. thaliana</i> Best Hit (e value) |
|---------|------------------|-------------------------|------------------|---------------------------------------|
| MtPrx41 | Medtr7g029030.1  | 320                     | -                | AtPrx55 (2e – 137)                    |
| MtPrx42 | Medtr5g016010.1  | 328                     | -                | AtPrx35 (3e – 153)                    |
| MtPrx43 | Medtr2g084010.1  | 318                     | -                | AtPrx52 (1e – 129)                    |
| MtPrx44 | Medtr2g084000.1  | 319                     | 1691 (-)         | AtPrx52 (2e – 126)                    |
| MtPrx45 | Medtr1g022970.1  | 347                     | -                | AtPrx9 (1e – 172)                     |
| MtPrx46 | Medtr5g021060.1  | 331                     | -                | AtPrx72 (0.0)                         |
| MtPrx47 | Medtr4g132110.1  | 335                     | -                | AtPrx42 (0.0)                         |
| MtPrx48 | Medtr6g043240.1  | 352                     | 1982 (+)         | AtPrx12(1e – 117)                     |
| MtPrx49 | Medtr4g029180.1  | 321                     | -                | AtPrx52 (1e – 95)                     |
| MtPrx50 | Medtr1g038680.1  | 332                     | -                | AtPrx39 (2e – 89)                     |
| MtPrx52 | Medtr5g017850.1  | 326                     | -                | AtPrx10 (4e – 132)                    |
| MtPrx53 | Medtr4g046713.1  | 326                     | 1928 (+)         | AtPrx03 (5e – 144)                    |
| MtPrx54 | Medtr3g094650.1  | 322                     | 1941 (+)         | AtPrx52 (2e – 159)                    |
| MtPrx55 | Medtr1g025980.1  | 318                     | 318 (+)          | AtPrx64 (3e – 169)                    |
| MtPrx56 | Medtr1g066380.1  | 325                     | -                | AtPrx21 (3e – 177)                    |
| MtPrx57 | Medtr2g084080.1  | 317                     | -                | AtPrx52 (3e – 137)                    |
| MtPrx58 | Medtr5g017860.1  | 326                     | 892 (-)          | AtPrx10 (1e – 130)                    |
| MtPrx60 | Medtr2g099175.1  | 336                     | -                | AtPrx26 (4e – 134)                    |
| MtPrx61 | Medtr7g026990.1  | 323                     | 460 (+)          | AtPrx52 (3e – 112)                    |
| MtPrx63 | Medtr2g084090.1  | 318                     | -                | AtPrx52 (2e – 132)                    |
| MtPrx64 | Medtr0147s0010.1 | 393                     | -                | AtPrx48 (5e – 111)                    |
| MtPrx65 | Medtr1g086320.1  | 333                     | 590 (+)          | AtPrx66 (6e – 82)                     |
| MtPrx66 | Medtr4g114210.1  | 320                     | -                | AtPrx25 (1e – 172)                    |
| MtPrx67 | Medtr4g083710.1  | 321                     | 23 (-); 222 (-)  | AtPrx05 (9e – 163)                    |
| MtPrx70 | Medtr5g074760.1  | 323                     | -                | AtPrx52 (3e – 114)                    |
| MtPrx71 | Medtr2g028980.1  | 355                     | -                | AtPrx53 (4e – 125)                    |
| MtPrx74 | Medtr4g087965.1  | 346                     | -                | AtPrx19 (3e – 156)                    |
| MtPrx75 | Medtr6g043460.1  | 348                     | -                | AtPrx12 (1e – 100)                    |
| MtPrx76 | Medtr4g074990.1  | 320                     | -                | AtPrx5 (6e – 156)                     |
| MtPrx78 | Medtr6g027440.1  | 319                     | -                | AtPrx57 (2e – 105)                    |
| MtPrx79 | Medtr6g008075.1  | 334                     | -                | AtPrx63 (3e – 152)                    |
| MtPrx81 | Medtr4g029170.1  | 321                     | -                | AtPrx52 (8e – 128)                    |
| MtPrx82 | Medtr2g067440.1  | 389                     | -                | AtPrx48 (1e – 96)                     |
| MtPrx83 | Medtr5g033470.1  | 377                     | -                | AtPrx28 (3e – 64)                     |
| MtPrx84 | Medtr3g094630.1  | 322                     | 346 (+)          | AtPrx52 (5e – 173)                    |
| MtPrx85 | Medtr4g122640.1  | 336                     | -                | AtPrx40 (4e – 136)                    |
| MtPrx86 | Medtr5g074710.1  | 323                     | -                | AtPrx52 (2e – 114)                    |
| MtPrx87 | Medtr1g086490.1  | 342                     | -                | AtPrx28 (5e – 82)                     |
| MtPrx88 | Medtr7g086870.1  | 312                     | 1026 (-)         | AtPrx44 (1e – 120)                    |
| MtPrx89 | Medtr7g086820.1  | 315                     | -                | AtPrx44 (4e – 129)                    |
| MtPrx90 | Medtr5g014100.1  | 332                     | -                | AtPrx20 (2e – 121)                    |
| MtPrx91 | Medtr8g062780.1  | 329                     | 711 (+); 757 (-) | AtPrx65 (7e – 134)                    |
| MtPrx92 | Medtr8g075100.1  | 319                     | -                | AtPrx64 (6e – 123)                    |
| MtPrx93 | Medtr4g132490.1  | 327                     | -                | AtPrx29 (6e – 108)                    |

Table S3. *Cont.*

| Name     | Gene Accession  | Length<br>(amino acids) | XYLAT    | <i>A. thaliana</i> Best Hit (e value) |
|----------|-----------------|-------------------------|----------|---------------------------------------|
| MtPrx94  | Medtr4g030890.1 | 415                     | -        | AtPrx17 (0.0)                         |
| MtPrx95  | Medtr4g031140.1 | 343                     | -        | AtPrx17 (5e – 175)                    |
| MtPrx97  | Medtr2g084110.1 | 317                     | -        | AtPrx52 (2e – 133)                    |
| MtPrx98  | Medtr3g094670.1 | 322                     | -        | AtPrx52 (2e – 134)                    |
| MtPrx100 | Medtr2g437770.1 | 343                     | -        | AtPrx07 (6e – 131)                    |
| MtPrx107 | Medtr3g105790.1 | 324                     | -        | AtPrx46 (1e – 144)                    |
| MtPrx110 | Medtr4g074980.1 | 294                     | 1040 (+) | AtPrx5 (3e – 128)                     |
| MtPrx111 | Medtr2g029560.1 | 344                     | -        | AtPrx54 (3e – 131)                    |
| MtPrx114 | Medtr3g105790.1 | 324                     | -        | AtPrx46 (1e – 144)                    |



**Table S4.** Expression values  $\pm$  standard deviations relative to the heat map in Figure 4 and retrieved from the *Medicago* eFP browser.

| Tissue                  | MtPrx01                   | MtPrx03                   | MtPrx04                  | MtPrx06                 | MtPrx07                 | MtPrx08                    | MtPrx10                   | MtPrx13                  | MtPrx14                 | MtPrx15                    |
|-------------------------|---------------------------|---------------------------|--------------------------|-------------------------|-------------------------|----------------------------|---------------------------|--------------------------|-------------------------|----------------------------|
| Root                    | 1594.56 $\pm$ 194.77      | 36.09 $\pm$ 9.1           | 8838.53 $\pm$<br>1522.58 | 2148.74 $\pm$<br>101.46 | 2591.25 $\pm$ 94.57     | 633.48 $\pm$ 51.82         | 15,320.5 $\pm$<br>1278.95 | 5164.14 $\pm$ 436.11     | 6269.31 $\pm$<br>545.36 | 21,339.63 $\pm$<br>1506.78 |
| Stem                    | 10.63 $\pm$ 13.43         | 23.55 $\pm$ 21.13         | 74.02 $\pm$ 11.68        | 417.75 $\pm$ 24.32      | 20.09 $\pm$ 19.02       | 17,797.36 $\pm$<br>858.95  | 661.28 $\pm$ 36.66        | 6996.69 $\pm$<br>1232.39 | 30.47 $\pm$ 5.48        | 6690.71 $\pm$<br>794.09    |
| Leaf with<br>Petiolules | 7.94 $\pm$ 5.82           | 24 $\pm$ 16.48            | 24.66 $\pm$ 26.79        | 1062.55 $\pm$<br>105.58 | 48.35 $\pm$ 14.63       | 4504.04 $\pm$ 277.34       | 1467.57 $\pm$ 160.8       | 2271.08 $\pm$ 198.85     | 47.51 $\pm$ 15.45       | 4962.9 $\pm$ 307.51        |
| Vegetative Bud          | 17.56 $\pm$ 11.62         | 19.42 $\pm$ 9.01          | 43.96 $\pm$ 4.46         | 95.68 $\pm$ 43.47       | 32.34 $\pm$ 10.15       | 5183.08 $\pm$ 184.67       | 1846.61 $\pm$ 97.33       | 2084.12 $\pm$ 232.6      | 58.57 $\pm$ 8.46        | 10,255.53 $\pm$<br>894.87  |
| Flower                  | 4.65 $\pm$ 2.7            | 31.54 $\pm$ 16.89         | 17.18 $\pm$ 10.51        | 788.98 $\pm$ 26.77      | 41.36 $\pm$ 22.05       | 3097.78 $\pm$ 365.62       | 90.06 $\pm$ 23.35         | 2383.17 $\pm$ 120.43     | 27.52 $\pm$ 14.16       | 1528.73 $\pm$<br>109.39    |
| Pod                     | 86.96 $\pm$ 35.93         | 4.25 $\pm$ 1.91           | 86.25 $\pm$ 27.64        | 33.29 $\pm$ 9.95        | 33.08 $\pm$ 21.42       | 22,513.1 $\pm$<br>1346.44  | 301.69 $\pm$ 75.01        | 6703.42 $\pm$<br>1258.03 | 52.16 $\pm$ 18.58       | 9044.48 $\pm$<br>447.21    |
| Nodule Mature<br>(4w)   | 1556.12 $\pm$ 334.65      | 13,258.56 $\pm$<br>956.71 | 205.58 $\pm$ 69.52       | 293.35 $\pm$ 219.11     | 1998.81 $\pm$ 93.56     | 98.29 $\pm$ 28.85          | 9445.96 $\pm$ 679.62      | 399.55 $\pm$ 104.79      | 4180.66 $\pm$<br>738.72 | 18,453.83 $\pm$<br>727.15  |
| Tissue                  | MtPrx16                   | MtPrx18                   | MtPrx19                  | MtPrx20                 | MtPrx22                 | MtPrx23                    | MtPrx25                   | MtPrx27                  | MtPrx29                 | MtPrx30                    |
| Root                    | 15,663.03 $\pm$<br>787.73 | 436.61 $\pm$ 21.3         | 12,407.7 $\pm$<br>972.52 | 118.97 $\pm$ 21.53      | 2488.86 $\pm$<br>127.76 | 1149.55 $\pm$ 104.15       | 3204.13 $\pm$ 236.1       | 4413.84 $\pm$ 262.51     | 6049.6 $\pm$ 490.06     | 20.81 $\pm$ 12.4           |
| Stem                    | 102.04 $\pm$ 17.6         | 7.64 $\pm$ 3.52           | 1071.46 $\pm$ 26.6       | 2457.01 $\pm$<br>259.21 | 59.91 $\pm$ 13.41       | 490.2 $\pm$ 53.18          | 842.07 $\pm$ 68.86        | 52.5 $\pm$ 34.38         | 2591.73 $\pm$<br>133.62 | 13.97 $\pm$ 14.73          |
| Leaf with<br>Petiolules | 56.4 $\pm$ 25.67          | 11.3 $\pm$ 9.89           | 659.27 $\pm$ 64.09       | 6532.35 $\pm$<br>540.54 | 66.06 $\pm$ 20.95       | 39.46 $\pm$ 20.81          | 187.16 $\pm$ 19.38        | 32.94 $\pm$ 27.16        | 297.57 $\pm$ 45.04      | 25.97 $\pm$ 1.11           |
| Vegetative Bud          | 108.52 $\pm$ 24.16        | 18.08 $\pm$ 10.26         | 416.96 $\pm$ 6.66        | 4743.75 $\pm$<br>119.62 | 58.28 $\pm$ 8.49        | 83.18 $\pm$ 15.43          | 185.39 $\pm$ 37.25        | 24.9 $\pm$ 10.97         | 539.91 $\pm$ 20.19      | 4.01 $\pm$ 1.46            |
| Flower                  | 24.27 $\pm$ 14.78         | 97.49 $\pm$ 16.47         | 7002.84 $\pm$ 163.01     | 827.91 $\pm$ 16.2       | 51.03 $\pm$ 16.83       | 248.74 $\pm$ 29.13         | 240.59 $\pm$ 49.82        | 8.63 $\pm$ 8.48          | 1610.46 $\pm$ 281.5     | 20.31 $\pm$ 26.04          |
| Pod                     | 46.7 $\pm$ 4.19           | 23.72 $\pm$ 14.55         | 462.52 $\pm$ 10.3        | 2802 $\pm$ 192.84       | 97.26 $\pm$ 22.91       | 10,166.21 $\pm$<br>3760.63 | 264.29 $\pm$ 11.39        | 159.68 $\pm$ 63.58       | 354.71 $\pm$ 98.77      | 116.08 $\pm$ 25.15         |
| Nodule Mature<br>(4w)   | 7693.85 $\pm$ 482         | 37.78 $\pm$ 19.76         | 1214.38 $\pm$ 383.15     | 1305.82 $\pm$ 40.34     | 1728.34 $\pm$<br>158.91 | 215.51 $\pm$ 39.84         | 557.9 $\pm$ 91.8          | 1903.93 $\pm$ 505.47     | 1432.26 $\pm$ 129       | 16.4 $\pm$ 9.55            |

Table S4. *Cont.*

| Tissue                  | MtPrx36             | MtPrx37             | MtPrx38                | MtPrx39             | MtPrx41             | MtPrx42               | MtPrx43            | MtPrx44             | MtPrx47                | MtPrx52              |
|-------------------------|---------------------|---------------------|------------------------|---------------------|---------------------|-----------------------|--------------------|---------------------|------------------------|----------------------|
| Root                    | 6503.73 ±<br>294.23 | 76 ± 19.23          | 19,933.83 ±<br>1144.04 | 4591.92 ±<br>273.31 | 4988.4 ± 499.32     | 2626.66 ± 191.6       | 391.07 ± 37.65     | 3838.35 ± 79.5      | 10,583.07 ± 691.13     | 9628.54 ±<br>1011.28 |
| Stem                    | 14.92 ± 9.13        | 1769.5 ± 102.46     | 7259.35 ± 446.77       | 16.9 ± 4.67         | 183.57 ± 3.81       | 11,770.56 ±<br>753.09 | 56.45 ± 13.28      | 30.33 ± 27.81       | 2739.68 ± 112.86       | 19.51 ± 8.71         |
| Leaf with<br>Petiolules | 16.38 ± 10.39       | 4982.21 ±<br>216.17 | 684.68 ± 47.49         | 6.23 ± 5.8          | 3648.11 ±<br>229.22 | 2764.65 ± 182.8       | 31.08 ± 11.95      | 39.41 ± 9.09        | 76.47 ± 24.68          | 13.63 ± 13.5         |
| Vegetative Bud          | 9.46 ± 10.58        | 1668.85 ±<br>188.02 | 4429.07 ± 290.77       | 1.42 ± 0.39         | 279.3 ± 3.39        | 8579.15 ± 230.39      | 145.11 ± 24.69     | 40.08 ± 10.47       | 226.57 ± 35.97         | 19.84 ± 14.14        |
| Flower                  | 4.8 ± 2.6           | 582.12 ± 97.95      | 2772.81 ± 382.81       | 9.27 ± 10.24        | 58.87 ± 11.58       | 4376.59 ± 152.68      | 1053.52 ±<br>52.82 | 30.63 ± 26.39       | 737.37 ± 87.64         | 12.64 ± 7.58         |
| Pod                     | 4.16 ± 2.87         | 3752.27 ±<br>223.42 | 12,410.9 ± 1444.4      | 4.48 ± 3.68         | 68.64 ± 2.47        | 16,312.2 ±<br>1202.62 | 63.18 ± 11.55      | 34.37 ± 14.58       | 21,587.23 ±<br>1484.06 | 29.33 ± 11.78        |
| Nodule Mature<br>(4w)   | 2980.48 ±<br>311.15 | 351.93 ± 85.25      | 5289.36 ± 1198.59      | 152.58 ± 12.74      | 4559.98 ±<br>130.46 | 8266.33 ± 475.92      | 91.99 ± 36.57      | 2543.42 ±<br>517.57 | 7585.6 ± 503.42        | 362.31 ± 109.9       |
| Tissue                  | MtPrx54             | MtPrx55             | MtPrx56                | MtPrx57             | MtPrx61             | MtPrx63               | MtPrx64            | MtPrx66             | MtPrx67                | MtPrx71              |
| Root                    | 37.39 ± 14.36       | 837.09 ± 83.35      | 777.52 ± 141.69        | 85.56 ± 24.38       | 2862.53 ±<br>350.41 | 8.25 ± 6.38           | 14.46 ± 4.48       | 3538.31 ±<br>165.35 | 29.45 ± 15.3           | 214.84 ± 64.44       |
| Stem                    | 9057.28 ±<br>582.76 | 19.44 ± 11.44       | 148.12 ± 26.56         | 31.43 ± 8.56        | 13.83 ± 8.04        | 1.87 ± 0.7            | 16.09 ± 19.33      | 72.94 ± 4.57        | 38.43 ± 25.61          | 38.52 ± 2.6          |
| Leaf with<br>Petiolules | 784.98 ± 61.34      | 11.44 ± 11.36       | 143.59 ± 16.52         | 35.43 ± 19.84       | 6.24 ± 3.12         | 19.63 ± 10.12         | 5.09 ± 2.41        | 20.35 ± 14.83       | 36.86 ± 22.5           | 26.53 ± 14.14        |
| Vegetative Bud          | 2604.66 ± 83.88     | 8.71 ± 4.83         | 50.75 ± 3.21           | 28.4 ± 18.19        | 29.22 ± 20.16       | 16.2 ± 5.06           | 7.98 ± 4.59        | 16.19 ± 16.19       | 41.69 ± 24             | 37.8 ± 34.56         |
| Flower                  | 5620.42 ±<br>761.83 | 9.37 ± 9.97         | 171.02 ± 15.21         | 39.88 ± 15.82       | 15.35 ± 9.06        | 28.7 ± 21.94          | 11.19 ± 9.27       | 12.87 ± 11.36       | 9.44 ± 2.03            | 17.23 ± 5.32         |
| Pod                     | 1106.2 ± 272.13     | 23.45 ± 6.87        | 336.51 ± 84.03         | 33.69 ± 22.49       | 59.94 ± 21.76       | 920.87 ± 226.65       | 9.34 ± 7.18        | 11.08 ± 10.93       | 23.01 ± 16.18          | 11.01 ± 5.51         |
| Nodule Mature<br>(4w)   | 23.03 ± 23.74       | 56.52 ± 15.67       | 147.02 ± 50.74         | 45.95 ± 6.24        | 73.46 ± 22.25       | 26.86 ± 16.06         | 8.58 ± 3.89        | 881.46 ± 92.43      | 34.49 ± 16.46          | 36.06 ± 11.83        |

Table S4. Cont.

| Tissue               | MtPrx75      | MtPrx78         | MtPrx81          | MtPrx83          | MtPrx85        | MtPrx86          | MtPrx90        | MtPrx91        | MtPrx94          | MtPrx110      |
|----------------------|--------------|-----------------|------------------|------------------|----------------|------------------|----------------|----------------|------------------|---------------|
| Root                 | 61.81 ± 31.8 | 23.88 ± 9.87    | 5885.43 ± 449.21 | 25.58 ± 11.67    | 10.56 ± 6.68   | 2198.78 ± 317.12 | 439.32 ± 27.16 | 31.87 ± 13.04  | 1017.54 ± 24.87  | 6.41 ± 6.72   |
| Stem                 | 7.06 ± 4.05  | 7.79 ± 3.56     | 8.85 ± 4.69      | 27.13 ± 13       | 56.23 ± 7.1    | 18.38 ± 12.44    | 12.19 ± 6.22   | 20.13 ± 21.75  | 631.45 ± 50.6    | 1.94 ± 0.27   |
| Leaf with Petiolules | 6.57 ± 3.3   | 20.35 ± 14.95   | 10.33 ± 10.95    | 18.93 ± 6.52     | 289.45 ± 53.47 | 12.31 ± 11.63    | 19.91 ± 8.48   | 31.16 ± 34.99  | 437.06 ± 97.53   | 23.14 ± 12.89 |
| Vegetative Bud       | 9.41 ± 7.3   | 4.34 ± 4.18     | 8.83 ± 7.1       | 14.26 ± 13.19    | 26.14 ± 19.31  | 9.39 ± 5.27      | 14.02 ± 12.25  | 15.9 ± 11.71   | 661.99 ± 35.01   | 10.24 ± 12.02 |
| Flower               | 4.59 ± 0.82  | 103.72 ± 26.82  | 11.29 ± 6.56     | 4980.06 ± 662.31 | 6.39 ± 1.56    | 5.98 ± 2.61      | 26.76 ± 17.83  | 276.67 ± 63.12 | 2079.65 ± 171.48 | 13.31 ± 15.1  |
| Pod                  | 13.96 ± 5.59 | 967.16 ± 223.73 | 2.46 ± 0.42      | 284.94 ± 71.42   | 6.94 ± 3.47    | 17.61 ± 13.42    | 23.21 ± 16.45  | 33.27 ± 2.55   | 1003.83 ± 34.45  | 13.88 ± 14.3  |
| Nodule Mature (4w)   | 10.5 ± 3.58  | 11.96 ± 10.48   | 253.24 ± 31.77   | 31.64 ± 12.97    | 30.69 ± 24.45  | 127.2 ± 74.25    | 310.74 ± 65.14 | 8.91 ± 9.16    | 2324.17 ± 176.36 | 2.52 ± 0.58   |

**Table S5.** Normalized Relative Expression for *CesA* genes in alfalfa roots. Normalized Relative Expression values ± standard error of the mean and significance (Sign.). Data were normalized using PAB4/TFIIA. Means sharing a letter are not significantly different at  $\alpha = 0.05$  (Tukey post hoc test). \* The asterisk indicates genes showing non-normal distribution of the variances, but individually ranked using the ANOVA one-way for clarity of presentation. These data have been analysed with the test of Kruskal-Wallis and have shown rejection the null hypothesis (*i.e.*, the mean ranks of the different groups are different).

| Time Point | CesA1 *     | Sign. | CesA3 *     | Sign. | CesA6B *    | Sign. | CesA6C *    | Sign. | CesA6F *    | Sign. | CesA4       | Sign. | CesA7B *    | Sign. | CesA7A *    | Sign. | CesA8 *     | Sign. |
|------------|-------------|-------|-------------|-------|-------------|-------|-------------|-------|-------------|-------|-------------|-------|-------------|-------|-------------|-------|-------------|-------|
| Ctrl 0 h   | 0.82 ± 0.12 | a     | 1.32 ± 0.09 | d     | 0.9 ± 0.07  | abc   | 1.52 ± 0.23 | cd    | 1.17 ± 0.06 | bc    | 1.11 ± 0.14 | bc    | 1.63 ± 0.13 | c     | 1.69 ± 0.06 | d     | 1.9 ± 0.16  | d     |
| Ctrl 24 h  | 0.85 ± 0.07 | a     | 0.88 ± 0.01 | abcd  | 0.9 ± 0.06  | abc   | 1.86 ± 0.45 | d     | 1.27 ± 0.17 | bc    | 0.97 ± 0.11 | bc    | 1.08 ± 0.12 | c     | 1.12 ± 0.1  | cd    | 1.32 ± 0.16 | cd    |
| Ctrl 72 h  | 1.09 ± 0.11 | ab    | 1.11 ± 0.07 | bcd   | 1.3 ± 0.05  | bc    | 1.77 ± 0.08 | d     | 2.07 ± 0.26 | c     | 2.29 ± 0.12 | c     | 1.92 ± 0.05 | c     | 1.96 ± 0.35 | d     | 2.6 ± 0.41  | d     |
| Ctrl 96 h  | 0.92 ± 0.13 | a     | 0.97 ± 0.12 | abcd  | 1.21 ± 0.21 | bc    | 1.45 ± 0.14 | cd    | 1.67 ± 0.09 | bc    | 1.93 ± 0.31 | bc    | 1.68 ± 0.19 | c     | 2.08 ± 0.26 | d     | 2.22 ± 0.45 | d     |
| Cold-24 h  | 1.7 ± 0.14  | b     | 1.54 ± 0.34 | d     | 1.47 ± 0.34 | c     | 0.99 ± 0.17 | cd    | 0.88 ± 0.13 | abc   | 1.55 ± 0.22 | bc    | 1.36 ± 0.1  | c     | 1.05 ± 0.23 | cd    | 1.83 ± 0.16 | d     |
| Cold-72 h  | 1.32 ± 0.02 | ab    | 1.42 ± 0.03 | d     | 1.26 ± 0.09 | bc    | 0.94 ± 0.09 | cd    | 0.72 ± 0.04 | abc   | 1.63 ± 0.19 | bc    | 1.5 ± 0.19  | c     | 1.89 ± 0.19 | d     | 1.92 ± 0.3  | d     |
| Cold-96 h  | 1.23 ± 0.08 | ab    | 1.41 ± 0.21 | d     | 1.33 ± 0.13 | bc    | 0.7 ± 0.07  | bc    | 1.07 ± 0.09 | abc   | 1.07 ± 0.16 | bc    | 1.5 ± 0.31  | c     | 1.26 ± 0.1  | cd    | 2.28 ± 0.57 | d     |
| Heat-24 h  | 0.93 ± 0.04 | a     | 0.69 ± 0.05 | abc   | 0.71 ± 0.06 | ab    | 0.8 ± 0.19  | bc    | 1.07 ± 0.15 | abc   | 0.84 ± 0.2  | b     | 0.8 ± 0.25  | bc    | 0.62 ± 0.29 | bc    | 0.39 ± 0.14 | bc    |
| Heat-72 h  | 0.79 ± 0.01 | a     | 0.62 ± 0.04 | ab    | 0.55 ± 0.01 | a     | 0.38 ± 0.03 | ab    | 0.6 ± 0.1   | ab    | 0.26 ± 0.02 | a     | 0.27 ± 0.06 | ab    | 0.32 ± 0.01 | ab    | 0.06 ± 0.01 | a     |
| Heat-96 h  | 0.8 ± 0.02  | a     | 0.54 ± 0.01 | a     | 0.77 ± 0.11 | abc   | 0.3 ± 0.05  | a     | 0.56 ± 0.38 | a     | 0.21 ± 0.05 | a     | 0.26 ± 0.14 | a     | 0.18 ± 0.01 | a     | 0.13 ± 0.06 | ab    |
| Salt-24 h  | 0.9 ± 0.08  | a     | 1.2 ± 0.21  | cd    | 1.06 ± 0.14 | bc    | 1.34 ± 0.3  | cd    | 1.03 ± 0.2  | abc   | 1.12 ± 0.15 | bc    | 1.31 ± 0.12 | c     | 1.5 ± 0.13  | d     | 1.74 ± 0.24 | d     |
| Salt-72 h  | 0.98 ± 0.06 | a     | 0.97 ± 0.09 | abcd  | 1.07 ± 0.05 | bc    | 1.54 ± 0.05 | cd    | 1.35 ± 0.09 | bc    | 1.32 ± 0.16 | bc    | 1.13 ± 0.07 | c     | 1.01 ± 0.23 | cd    | 1.67 ± 0.39 | d     |
| Salt-96 h  | 1.06 ± 0.19 | ab    | 1.07 ± 0.07 | bcd   | 1.07 ± 0.09 | bc    | 1.45 ± 0.04 | cd    | 1.08 ± 0.2  | abc   | 1.5 ± 0.31  | bc    | 1.37 ± 0.36 | c     | 1.46 ± 0.32 | d     | 2.14 ± 0.55 | d     |



**Table S6.** Normalized Relative Expression for CAD, PAL, genes encoding dirigent-like proteins and class III peroxidases in alfalfa roots. Normalized Relative Expression values  $\pm$  standard error of the mean and significance (Sign.). Data were normalized using PAB4/TFIIA. Means sharing a letter are not significantly different at  $\alpha = 0.05$  (Tukey post hoc test). \* The asterisk indicates genes showing non-normal distribution of the variances, but individually ranked using the ANOVA one-way for clarity of presentation. These data have been analysed with the test of Kruskal-Wallis and have shown rejection the null hypothesis (*i.e.*, the mean ranks of the different groups are different).

| Time Point | CAD             | Sign. | PAL             | Sign. | Prx13           | Sign. | MsPrx12 *       | Sign. | MsPrx16 *       | Sign. | Medtr7g093850.1 | Sign. | Medtr1g054525.1 | Sign. |
|------------|-----------------|-------|-----------------|-------|-----------------|-------|-----------------|-------|-----------------|-------|-----------------|-------|-----------------|-------|
| Ctrl 0 h   | 1.09 $\pm$ 0.13 | ab    | 1.17 $\pm$ 0.28 | a     | 1.13 $\pm$ 0.07 | ab    | 1.17 $\pm$ 0.17 | abc   | 1.55 $\pm$ 0.06 | cde   | 0.56 $\pm$ 0.08 | a     | 1.34 $\pm$ 0.17 | cd    |
| Ctrl 24 h  | 0.83 $\pm$ 0.07 | a     | 0.87 $\pm$ 0.13 | a     | 0.84 $\pm$ 0.1  | a     | 1.19 $\pm$ 0.15 | abc   | 1.12 $\pm$ 0.06 | cd    | 0.87 $\pm$ 0.17 | ab    | 1.23 $\pm$ 0.21 | abc   |
| Ctrl 72 h  | 1.47 $\pm$ 0.14 | b     | 1.17 $\pm$ 0.24 | a     | 2.52 $\pm$ 0.45 | c     | 1.99 $\pm$ 0.23 | c     | 2.47 $\pm$ 0.43 | e     | 0.38 $\pm$ 0.18 | a     | 2.33 $\pm$ 0.6  | d     |
| Ctrl 96 h  | 1.24 $\pm$ 0.14 | ab    | 1.28 $\pm$ 0.45 | a     | 1.83 $\pm$ 0.19 | bc    | 1.31 $\pm$ 0.19 | abc   | 2.06 $\pm$ 0.4  | de    | 0.56 $\pm$ 0.08 | a     | 1.34 $\pm$ 0.17 | cd    |
| Cold-24 h  | 0.9 $\pm$ 0.04  | ab    | 0.82 $\pm$ 0.09 | a     | 0.89 $\pm$ 0.1  | ab    | 0.62 $\pm$ 0.17 | a     | 1.12 $\pm$ 0.07 | cd    | 1.17 $\pm$ 0.51 | ab    | 0.87 $\pm$ 0.07 | abc   |
| Cold-72 h  | 0.97 $\pm$ 0.12 | ab    | 0.98 $\pm$ 0.11 | a     | 0.91 $\pm$ 0.15 | ab    | 0.6 $\pm$ 0.03  | a     | 1.51 $\pm$ 0.04 | cde   | 1.01 $\pm$ 0.17 | ab    | 1.16 $\pm$ 0.22 | abc   |
| Cold-96 h  | 0.81 $\pm$ 0.1  | a     | 1.5 $\pm$ 0.12  | a     | 0.76 $\pm$ 0.06 | a     | 0.6 $\pm$ 0.07  | a     | 0.79 $\pm$ 0.08 | c     | 0.87 $\pm$ 0.17 | ab    | 1.23 $\pm$ 0.21 | abc   |
| Heat-24 h  | 1.16 $\pm$ 0.02 | ab    | 1.04 $\pm$ 0.22 | a     | 1.26 $\pm$ 0.32 | abc   | 1.42 $\pm$ 0.03 | bc    | 0.35 $\pm$ 0.06 | ab    | 1.3 $\pm$ 0.28  | ab    | 1.12 $\pm$ 0.12 | abc   |
| Heat-72 h  | 1.13 $\pm$ 0.08 | ab    | 0.98 $\pm$ 0.11 | a     | 0.68 $\pm$ 0.07 | a     | 0.66 $\pm$ 0.13 | ab    | 0.17 $\pm$ 0.01 | a     | 3.04 $\pm$ 0.5  | b     | 0.55 $\pm$ 0.08 | ab    |
| Heat-96 h  | 0.74 $\pm$ 0.02 | a     | 0.97 $\pm$ 0.24 | a     | 0.62 $\pm$ 0.11 | a     | 1.1 $\pm$ 0.08  | abc   | 0.39 $\pm$ 0.08 | b     | 1.17 $\pm$ 0.51 | ab    | 0.87 $\pm$ 0.07 | abc   |
| Salt-24 h  | 0.92 $\pm$ 0.13 | ab    | 1.14 $\pm$ 0.09 | a     | 1.02 $\pm$ 0.18 | ab    | 1.17 $\pm$ 0.29 | abc   | 1.61 $\pm$ 0.2  | cde   | 1.19 $\pm$ 0.25 | ab    | 1 $\pm$ 0.12    | abc   |
| Salt-72 h  | 0.96 $\pm$ 0.12 | ab    | 1.04 $\pm$ 0.1  | a     | 0.88 $\pm$ 0.12 | ab    | 1.47 $\pm$ 0.12 | c     | 1.65 $\pm$ 0.13 | de    | 0.36 $\pm$ 0.03 | a     | 1.16 $\pm$ 0.17 | abc   |
| Salt-96 h  | 1.07 $\pm$ 0.08 | ab    | 0.69 $\pm$ 0.07 | a     | 0.98 $\pm$ 0.1  | ab    | 0.89 $\pm$ 0.12 | abc   | 1.64 $\pm$ 0.33 | cde   | 1.3 $\pm$ 0.28  | ab    | 1.12 $\pm$ 0.12 | abc   |

**Table S7.** Normalized Relative Expression for *CesA* genes in alfalfa leaves. Normalized Relative Expression values  $\pm$  standard error of the mean and significance (Sign.). Data were normalized using eif4A/TFIIA. Means sharing a letter are not significantly different at  $\alpha = 0.05$  (Tukey post hoc test). \* The asterisk indicates genes showing non-normal distribution of the variances, but individually ranked using the ANOVA one-way for clarity of presentation. These data have been analysed with the test of Kruskal-Wallis and have shown rejection the null hypothesis (*i.e.*, the mean ranks of the different groups are different).

| Time Point | CesA1 *         | Sign. | CesA3 *         | Sign. | CesA6B *        | Sign. | CesA6C          | Sign. | CesA6F *        | Sign. | CesA4           | Sign. | CesA7B          | Sign. | CesA7A          | Sign. | CesA8 *         | Sign. |
|------------|-----------------|-------|-----------------|-------|-----------------|-------|-----------------|-------|-----------------|-------|-----------------|-------|-----------------|-------|-----------------|-------|-----------------|-------|
| Ctrl 0 h   | 0.82 $\pm$ 0.09 | a     | 1.05 $\pm$ 0.03 | abc   | 0.81 $\pm$ 0.05 | ab    | 0.97 $\pm$ 0.04 | b     | 0.82 $\pm$ 0.04 | a     | 0.97 $\pm$ 0.07 | abc   | 1.21 $\pm$ 0.14 | cd    | 0.97 $\pm$ 0.06 | abc   | 1.97 $\pm$ 0.23 | c     |
| Ctrl 24 h  | 0.94 $\pm$ 0.08 | ab    | 0.94 $\pm$ 0.12 | ab    | 0.78 $\pm$ 0.04 | ab    | 1.19 $\pm$ 0.16 | b     | 1.11 $\pm$ 0.06 | a     | 0.93 $\pm$ 0.04 | abc   | 1.34 $\pm$ 0.13 | cd    | 1 $\pm$ 0.04    | abc   | 1.43 $\pm$ 0.2  | c     |
| Ctrl 72 h  | 0.95 $\pm$ 0.06 | abc   | 0.83 $\pm$ 0.07 | a     | 0.98 $\pm$ 0.05 | abcd  | 1.16 $\pm$ 0.22 | b     | 1.24 $\pm$ 0.26 | a     | 1.1 $\pm$ 0.07  | bcd   | 1.09 $\pm$ 0.19 | cd    | 1.18 $\pm$ 0.06 | abc   | 1.31 $\pm$ 0.12 | c     |
| Ctrl 96 h  | 1.34 $\pm$ 0.04 | cd    | 1.12 $\pm$ 0.06 | abc   | 1.1 $\pm$ 0.01  | bcde  | 1.02 $\pm$ 0.11 | b     | 0.89 $\pm$ 0.11 | a     | 1.63 $\pm$ 0.2  | cd    | 1.4 $\pm$ 0.22  | cd    | 1.36 $\pm$ 0.27 | bc    | 1.15 $\pm$ 0.3  | c     |
| Cold-24 h  | 1.05 $\pm$ 0    | abc   | 1.13 $\pm$ 0.01 | abc   | 1.45 $\pm$ 0.13 | de    | 0.49 $\pm$ 0.03 | a     | 0.92 $\pm$ 0.1  | a     | 0.98 $\pm$ 0.08 | abc   | 1.16 $\pm$ 0.15 | cd    | 0.99 $\pm$ 0.16 | abc   | 1.38 $\pm$ 0.2  | c     |
| Cold-72 h  | 1.53 $\pm$ 0.06 | d     | 1.57 $\pm$ 0.16 | c     | 1.67 $\pm$ 0.06 | e     | 0.98 $\pm$ 0.07 | b     | 1.08 $\pm$ 0.34 | a     | 1.27 $\pm$ 0.27 | bcd   | 1.45 $\pm$ 0.28 | cd    | 1.19 $\pm$ 0.16 | abc   | 1.39 $\pm$ 0.12 | c     |
| Cold-96 h  | 0.94 $\pm$ 0.07 | ab    | 1.31 $\pm$ 0.06 | bc    | 1.12 $\pm$ 0.04 | bcde  | 0.45 $\pm$ 0.02 | a     | 0.64 $\pm$ 0.06 | a     | 0.93 $\pm$ 0.09 | abc   | 1.06 $\pm$ 0.09 | cd    | 0.62 $\pm$ 0.09 | a     | 1.06 $\pm$ 0.23 | bc    |
| Heat-24 h  | 0.85 $\pm$ 0.07 | a     | 0.79 $\pm$ 0.1  | a     | 0.65 $\pm$ 0.05 | a     | 1.09 $\pm$ 0.19 | b     | 1.01 $\pm$ 0.08 | a     | 0.72 $\pm$ 0.08 | ab    | 0.77 $\pm$ 0.1  | bc    | 1.09 $\pm$ 0.13 | abc   | 0.59 $\pm$ 0.15 | abc   |
| Heat-72 h  | 0.91 $\pm$ 0.09 | a     | 0.8 $\pm$ 0.1   | a     | 0.82 $\pm$ 0.07 | ab    | 1.31 $\pm$ 0.14 | b     | 1.36 $\pm$ 0.15 | a     | 0.66 $\pm$ 0.09 | ab    | 0.31 $\pm$ 0.05 | ab    | 0.82 $\pm$ 0.14 | abc   | 0.29 $\pm$ 0.12 | ab    |
| Heat-96 h  | 0.89 $\pm$ 0.02 | a     | 0.79 $\pm$ 0    | a     | 0.89 $\pm$ 0.05 | abc   | 1.2 $\pm$ 0.12  | b     | 1.26 $\pm$ 0.02 | a     | 0.52 $\pm$ 0.05 | a     | 0.27 $\pm$ 0.11 | a     | 0.63 $\pm$ 0.05 | ab    | 0.19 $\pm$ 0.07 | a     |
| Salt-24 h  | 1 $\pm$ 0.02    | abc   | 0.94 $\pm$ 0.01 | ab    | 0.85 $\pm$ 0.04 | ab    | 1.48 $\pm$ 0.23 | b     | 0.88 $\pm$ 0.13 | a     | 1.04 $\pm$ 0.06 | bcd   | 1.35 $\pm$ 0.17 | cd    | 1.06 $\pm$ 0.16 | abc   | 1.3 $\pm$ 0.13  | c     |
| Salt-72 h  | 0.77 $\pm$ 0.03 | a     | 0.96 $\pm$ 0.08 | ab    | 0.98 $\pm$ 0.03 | abcd  | 1.25 $\pm$ 0.29 | b     | 1.28 $\pm$ 0.33 | a     | 1.21 $\pm$ 0.21 | bcd   | 1.62 $\pm$ 0.5  | cd    | 1.2 $\pm$ 0.16  | abc   | 3.04 $\pm$ 1.72 | c     |
| Salt-96 h  | 1.28 $\pm$ 0.03 | bcd   | 1.07 $\pm$ 0.14 | abc   | 1.41 $\pm$ 0.35 | cde   | 1.26 $\pm$ 0.01 | b     | 1.1 $\pm$ 0.34  | a     | 1.94 $\pm$ 0.39 | d     | 2.47 $\pm$ 0.73 | d     | 1.53 $\pm$ 0.42 | c     | 2.46 $\pm$ 0.92 | c     |

**Table S8.** Normalized Relative Expression for CAD, PAL, genes encoding dirigent-like proteins and class III peroxidases in alfalfa leaves. Normalized Relative Expression values  $\pm$  standard error of the mean and significance (Sign.). Data were normalized using eif4A/TFIIA. Means sharing a letter are not significantly different at  $\alpha = 0.05$  (Tukey post hoc test). \* The asterisk indicates genes showing non-normal distribution of the variances, but individually ranked using the ANOVA one-way for clarity of presentation. These data have been analysed with the test of Kruskal-Wallis and have shown rejection the null hypothesis (*i.e.*, the mean ranks of the different groups are different).

| Time Point | CAD             | Sign. | PAL *           | Sign. | Prx13           | Sign. | MsPrx12         | Sign. | Medtr7g093850.1 * | Sign. | Medtr1g054525.1 | Sign. | Medtr4g078885.1 | Sign. |
|------------|-----------------|-------|-----------------|-------|-----------------|-------|-----------------|-------|-------------------|-------|-----------------|-------|-----------------|-------|
| Ctrl 0 h   | 1.14 $\pm$ 0.12 | a     | 0.83 $\pm$ 0.11 | ab    | 1.41 $\pm$ 0.04 | ab    | 2.02 $\pm$ 0.29 | ef    | 1.1 $\pm$ 0.3     | ab    | 1.16 $\pm$ 0.09 | bcd   | 0.9 $\pm$ 0.14  | bcd   |
| Ctrl 24 h  | 0.98 $\pm$ 0.13 | a     | 0.58 $\pm$ 0.05 | a     | 1.14 $\pm$ 0.01 | ab    | 2.09 $\pm$ 0.22 | ef    | 2.78 $\pm$ 1.04   | b     | 1.12 $\pm$ 0.08 | bcd   | 0.8 $\pm$ 0.21  | abc   |
| Ctrl 72 h  | 0.93 $\pm$ 0.18 | a     | 0.75 $\pm$ 0.03 | ab    | 1.04 $\pm$ 0.1  | ab    | 1.07 $\pm$ 0.05 | bcde  | 0.7 $\pm$ 0.58    | a     | 1.91 $\pm$ 0.27 | d     | 1.95 $\pm$ 0.49 | cde   |
| Ctrl 96 h  | 1.1 $\pm$ 0.19  | a     | 1.92 $\pm$ 0.41 | b     | 1.67 $\pm$ 0.34 | b     | 0.42 $\pm$ 0.03 | a     | 1.29 $\pm$ 0.42   | ab    | 1.16 $\pm$ 0.25 | bcd   | 2.46 $\pm$ 0.53 | cde   |
| Cold-24 h  | 0.66 $\pm$ 0.12 | a     | 1.6 $\pm$ 0.25  | ab    | 1.05 $\pm$ 0.15 | ab    | 0.85 $\pm$ 0.09 | abcd  | 0.46 $\pm$ 0.04   | ab    | 1.09 $\pm$ 0.17 | abcd  | 0.19 $\pm$ 0.05 | a     |
| Cold-72 h  | 1.34 $\pm$ 0.17 | a     | 1.18 $\pm$ 0.08 | ab    | 0.74 $\pm$ 0.23 | a     | 0.57 $\pm$ 0.09 | ab    | 0.63 $\pm$ 0.13   | ab    | 0.91 $\pm$ 0.1  | abc   | 0.27 $\pm$ 0.14 | ab    |
| Cold-96 h  | 0.91 $\pm$ 0.12 | a     | 0.9 $\pm$ 0.07  | ab    | 0.73 $\pm$ 0.09 | ab    | 0.65 $\pm$ 0.09 | abc   | 0.86 $\pm$ 0.3    | ab    | 1.2 $\pm$ 0.05  | bcd   | 0.25 $\pm$ 0.05 | ab    |
| Heat-24 h  | 1.21 $\pm$ 0.18 | a     | 0.89 $\pm$ 0.2  | ab    | 0.97 $\pm$ 0.12 | ab    | 1.18 $\pm$ 0.13 | cdef  | 0.91 $\pm$ 0.27   | ab    | 0.56 $\pm$ 0.06 | a     | 2.1 $\pm$ 0.35  | cde   |
| Heat-72 h  | 1.15 $\pm$ 0.09 | a     | 1.2 $\pm$ 0.07  | ab    | 0.72 $\pm$ 0.2  | a     | 0.85 $\pm$ 0.14 | abcd  | 1.94 $\pm$ 0.17   | ab    | 0.55 $\pm$ 0.09 | a     | 4.31 $\pm$ 1.06 | de    |
| Heat-96 h  | 1.08 $\pm$ 0.19 | a     | 2.36 $\pm$ 1.2  | b     | 0.72 $\pm$ 0.04 | ab    | 0.62 $\pm$ 0.06 | abc   | 1.77 $\pm$ 0.21   | ab    | 0.64 $\pm$ 0.01 | ab    | 5.52 $\pm$ 2.53 | e     |
| Salt-24 h  | 1.02 $\pm$ 0.19 | a     | 0.59 $\pm$ 0.08 | a     | 1.22 $\pm$ 0.09 | ab    | 2.25 $\pm$ 0.23 | f     | 0.71 $\pm$ 0.21   | ab    | 1.08 $\pm$ 0.2  | abcd  | 0.87 $\pm$ 0.25 | abc   |
| Salt-72 h  | 0.83 $\pm$ 0.09 | a     | 0.7 $\pm$ 0.01  | ab    | 1.08 $\pm$ 0.14 | ab    | 1.67 $\pm$ 0.24 | def   | 1.54 $\pm$ 0.36   | ab    | 1.04 $\pm$ 0.16 | abcd  | 0.8 $\pm$ 0.18  | abc   |
| Salt-96 h  | 1.07 $\pm$ 0.15 | a     | 1.39 $\pm$ 0.47 | ab    | 1.28 $\pm$ 0.34 | ab    | 0.82 $\pm$ 0.18 | abc   | 2.65 $\pm$ 0.67   | b     | 1.53 $\pm$ 0.16 | bc    | 2.01 $\pm$ 0.76 | cde   |



**Table S9.** Normalized Relative Expression for genes encoding dirigent-like proteins and class III peroxidases in alfalfa stems. Normalized Relative Expression values  $\pm$  standard error of the mean and significance (Sign.). Data were normalized using eif4A/PAB4. Means sharing a letter are not significantly different at  $\alpha = 0.05$  (Tukey post hoc test). \* The asterisk indicates genes showing non-normal distribution of the variances, but individually ranked using the ANOVA one-way for clarity of presentation. These data have been analysed with the test of Kruskal-Wallis and have shown rejection the null hypothesis (*i.e.*, the mean ranks of the different groups are different).

| Time Point | Medtr7g093850.1 * | Sign. | Medtr1g054525.1 | Sign. | Medtr4g078885.1 | Sign. | Prx13           | Sign. | MsPrx12 *       | Sign. | MsPrx16         | Sign. |
|------------|-------------------|-------|-----------------|-------|-----------------|-------|-----------------|-------|-----------------|-------|-----------------|-------|
| Ctrl 0 h   | 1.97 $\pm$ 0.87   | ab    | 1.62 $\pm$ 0.25 | e     | 1.94 $\pm$ 0.63 | b     | 1.53 $\pm$ 0.3  | bc    | 1.7 $\pm$ 0.33  | f     | 1.04 $\pm$ 0.2  | abc   |
| Ctrl 24 h  | 1.68 $\pm$ 0.43   | ab    | 1.35 $\pm$ 0.17 | de    | 1.12 $\pm$ 0.11 | b     | 0.98 $\pm$ 0.03 | abc   | 1.54 $\pm$ 0.12 | ef    | 0.85 $\pm$ 0.08 | abc   |
| Ctrl 72 h  | 0.51 $\pm$ 0.4    | a     | 1.49 $\pm$ 0.1  | e     | 0.61 $\pm$ 0.13 | ab    | 1.79 $\pm$ 0.01 | c     | 0.95 $\pm$ 0.06 | bcde  | 1 $\pm$ 0.13    | abc   |
| Ctrl 96 h  | 1.77 $\pm$ 0.59   | ab    | 1.45 $\pm$ 0.17 | de    | 2.2 $\pm$ 0.77  | b     | 1.89 $\pm$ 0.39 | c     | 1.01 $\pm$ 0.14 | bcdef | 1.38 $\pm$ 0.09 | bc    |
| Cold-24 h  | 0.62 $\pm$ 0.03   | ab    | 0.68 $\pm$ 0.1  | abc   | 0.19 $\pm$ 0.05 | a     | 1.1 $\pm$ 0.16  | abc   | 0.4 $\pm$ 0.01  | a     | 0.46 $\pm$ 0.07 | a     |
| Cold-72 h  | 0.39 $\pm$ 0.04   | ab    | 0.81 $\pm$ 0.01 | abcd  | 0.58 $\pm$ 0.11 | ab    | 0.63 $\pm$ 0.05 | a     | 0.61 $\pm$ 0.07 | ab    | 0.86 $\pm$ 0.15 | abc   |
| Cold-96 h  | 1.09 $\pm$ 0.1    | ab    | 1.11 $\pm$ 0.11 | bcde  | 0.61 $\pm$ 0.17 | ab    | 0.68 $\pm$ 0.01 | a     | 0.86 $\pm$ 0.06 | bcd   | 1.11 $\pm$ 0.15 | bc    |
| Heat-24 h  | 1.05 $\pm$ 0.21   | ab    | 0.59 $\pm$ 0.02 | a     | 0.93 $\pm$ 0.18 | b     | 0.72 $\pm$ 0.13 | a     | 1.08 $\pm$ 0.12 | cdef  | 1.73 $\pm$ 0.38 | c     |
| Heat-72 h  | 1.27 $\pm$ 0.11   | ab    | 0.46 $\pm$ 0.04 | a     | 1.36 $\pm$ 0.3  | b     | 0.8 $\pm$ 0.11  | ab    | 0.86 $\pm$ 0.03 | bcd   | 1.02 $\pm$ 0.27 | abc   |
| Heat-96 h  | 3.02 $\pm$ 0.66   | b     | 0.64 $\pm$ 0.09 | ab    | 2.03 $\pm$ 0.56 | b     | 0.6 $\pm$ 0.03  | a     | 0.77 $\pm$ 0.04 | bc    | 1.17 $\pm$ 0.1  | bc    |
| Salt-24 h  | 0.56 $\pm$ 0.26   | ab    | 1.23 $\pm$ 0.13 | cde   | 1.86 $\pm$ 0.36 | b     | 1.04 $\pm$ 0.02 | abc   | 1.59 $\pm$ 0.02 | ef    | 0.69 $\pm$ 0.09 | ab    |
| Salt-72 h  | 1.36 $\pm$ 0.26   | ab    | 1.22 $\pm$ 0.08 | cde   | 1.13 $\pm$ 0.5  | b     | 1.24 $\pm$ 0.21 | abc   | 1.36 $\pm$ 0.07 | def   | 1.42 $\pm$ 0.22 | bc    |
| Salt-96 h  | 2.52 $\pm$ 0.19   | b     | 1.48 $\pm$ 0.26 | de    | 2.29 $\pm$ 0.31 | b     | 1.14 $\pm$ 0.25 | abc   | 1.3 $\pm$ 0.16  | cdef  | 1.26 $\pm$ 0.11 | bc    |

**Table S10.** List of primers used for the RT-qPCR in this study. The names of the primers are in bold. Details concerning the primer sequences, amplicon length and T<sub>m</sub>, PCR efficiencies and regression coefficients are included.

| <b>Name</b>                     | <b>Sequence (5'→3')</b> | <b>Amplicon Length (bp)</b> | <b>Amplicon T<sub>m</sub> (°C)</b> | <b>PCR Efficiency (%)</b> | <b>Regression Coefficient (R<sup>2</sup>)</b> |
|---------------------------------|-------------------------|-----------------------------|------------------------------------|---------------------------|-----------------------------------------------|
| <b>qPCR Medtr7g093850.1 Fwd</b> | ATCACCATCGCCACAATCAC    | 118                         | 77.7                               | 98.3                      | 0.997                                         |
| <b>qPCR Medtr7g093850.1 Rev</b> | TGTGTGACTCCAGCATTTC     |                             |                                    |                           |                                               |
| <b>qPCR Medtr1g054525.1 Fwd</b> | TTCCGAAGTTGTGGGAAGAG    | 98                          | 80.7                               | 101.9                     | 0.998                                         |
| <b>qPCR Medtr1g054525.1 Rev</b> | TCCCTCGTGTGAAAGCAAAG    |                             |                                    |                           |                                               |
| <b>qPCR Medtr4g078885.1 Fwd</b> | ACTTGTAATCGTTGGTGTAGCAG | 108                         | 76.1                               | 110.7                     | 0.985                                         |
| <b>qPCR Medtr4g078885.1 Rev</b> | GCACATCCTCTTTTCGTGTG    |                             |                                    |                           |                                               |
| <b>qPCR Prx13 Fwd</b>           | CAGCCCGTATTTTGAGGATG    | 92                          | 80.2                               | 97.3                      | 0.998                                         |
| <b>qPCR Prx13 Rev</b>           | TGCTTGGTTAGTGGCAGTTG    |                             |                                    |                           |                                               |
| <b>qPCR Prx38 Fwd</b>           | GCTTCAGTTTTGGTGGCATC    | 137                         | 78.5                               | 93.0                      | 0.995                                         |
| <b>qPCR Prx38 Rev</b>           | TTTCTGCACTGTGGAACAGC    |                             |                                    |                           |                                               |
| <b>qPCR Prx42 Fwd</b>           | TCTTGCTATGGCAACTCGTG    | 132                         | 79.6                               | 96.1                      | 0.989                                         |
| <b>qPCR Prx42 Rev</b>           | TTGAATCCAGGCTCAGGAAG    |                             |                                    |                           |                                               |
